# Supplementary figures and images for: Prognostic Value of Necroptosis-Related Genes Signature in Oral Squamous Cell Carcinoma
Source: MDPI journal article supplement (doi:10.3390/cancers15184539), 2023-09-13

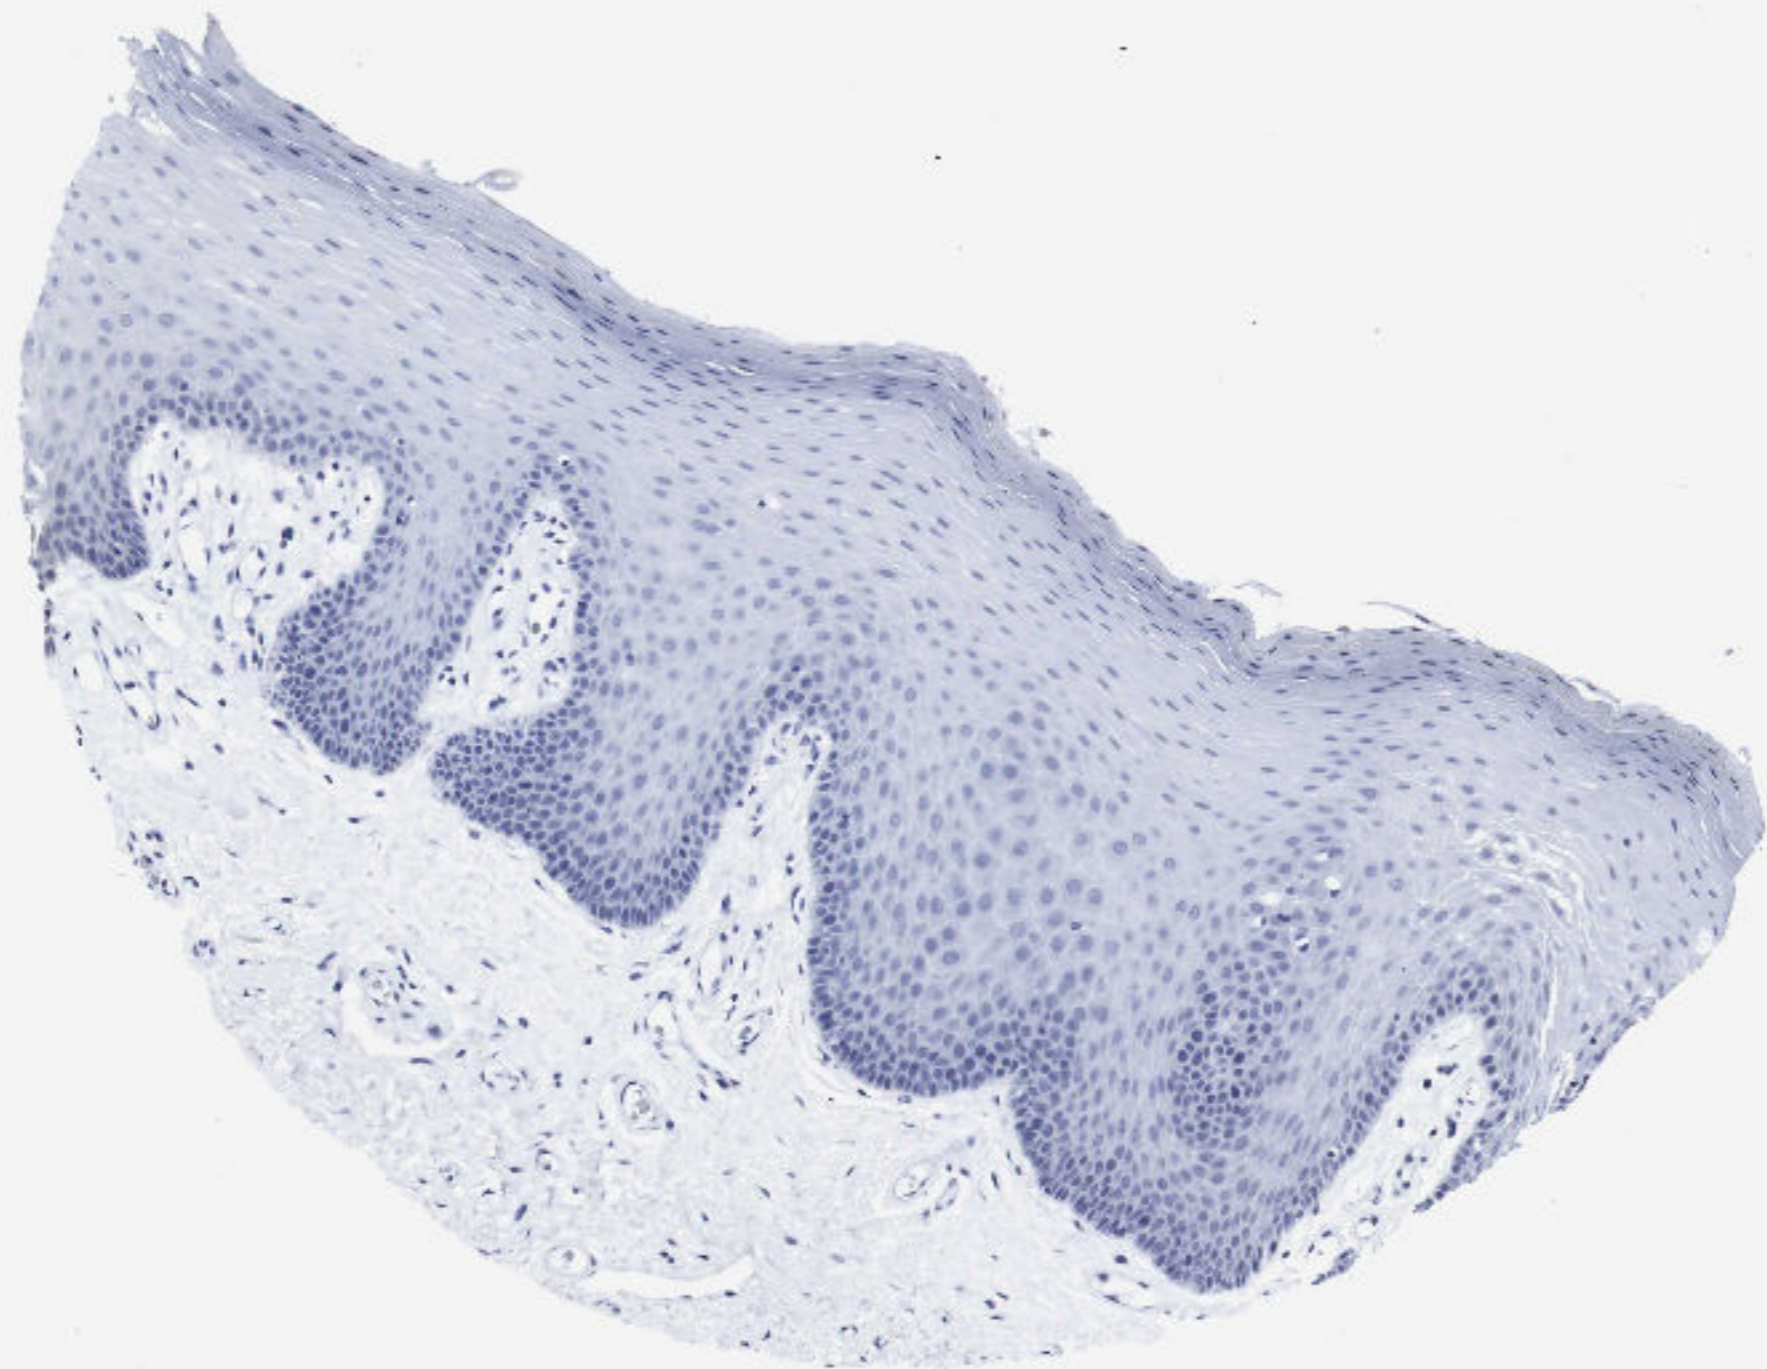

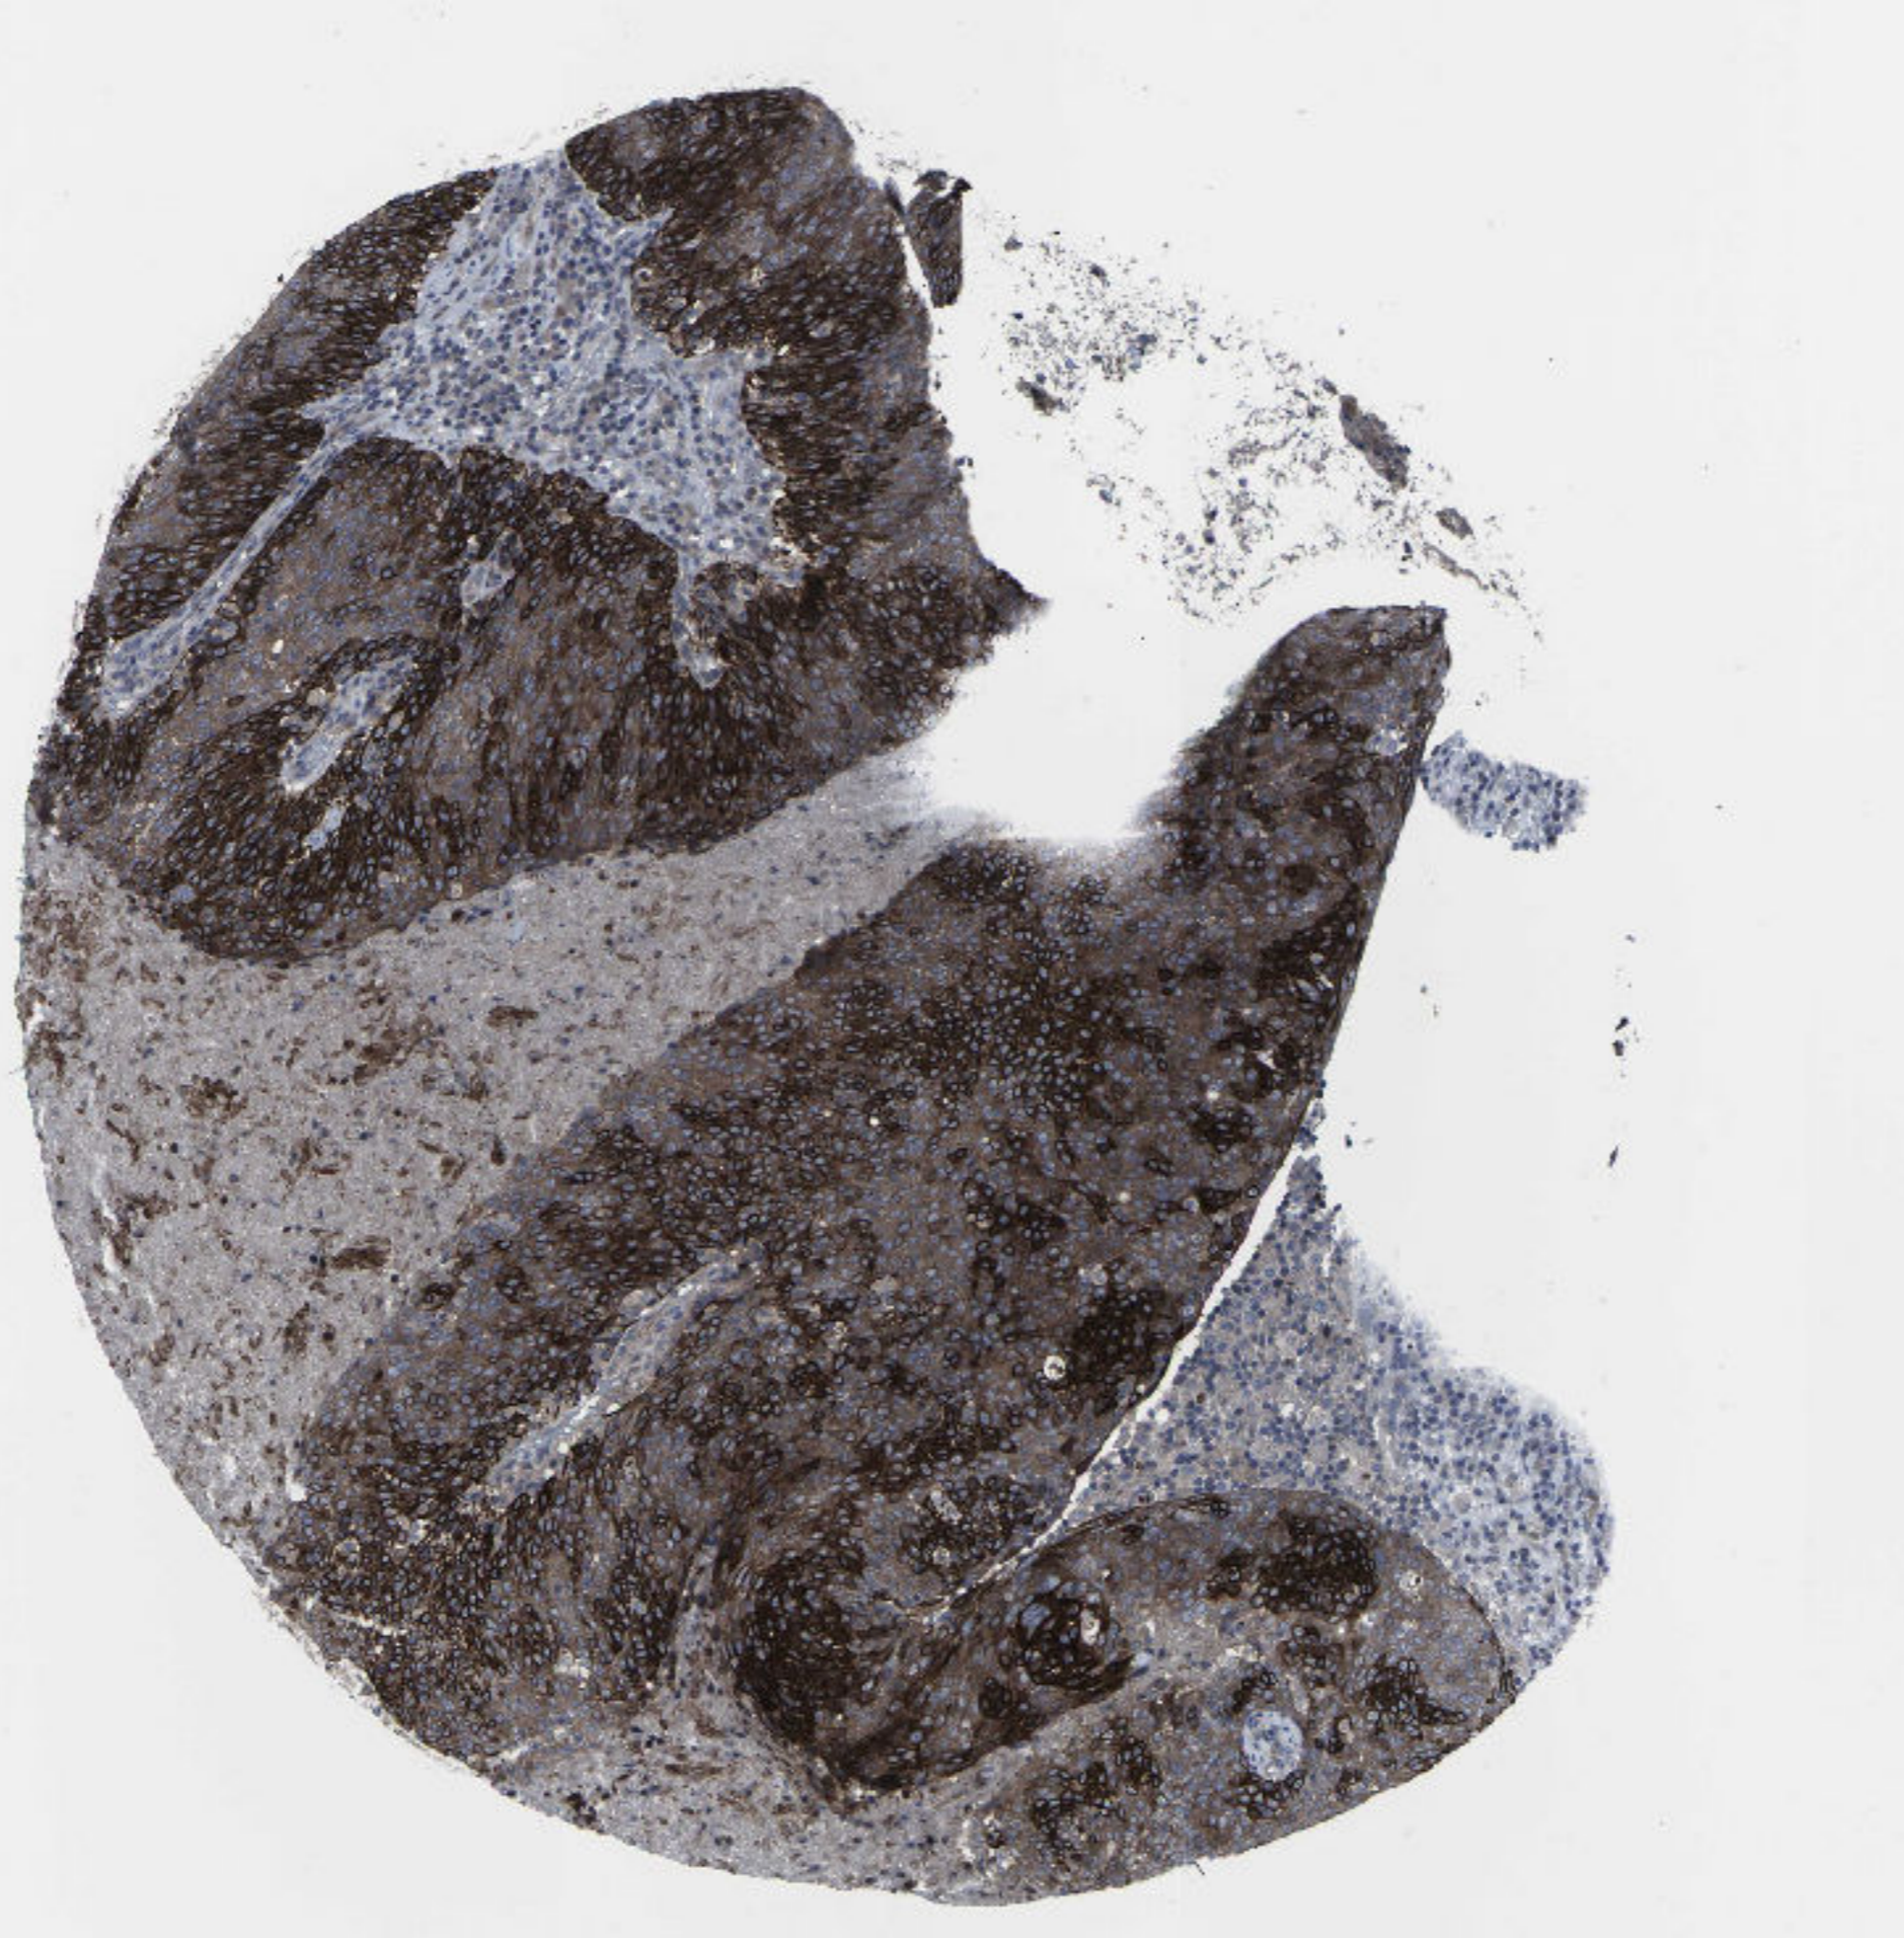

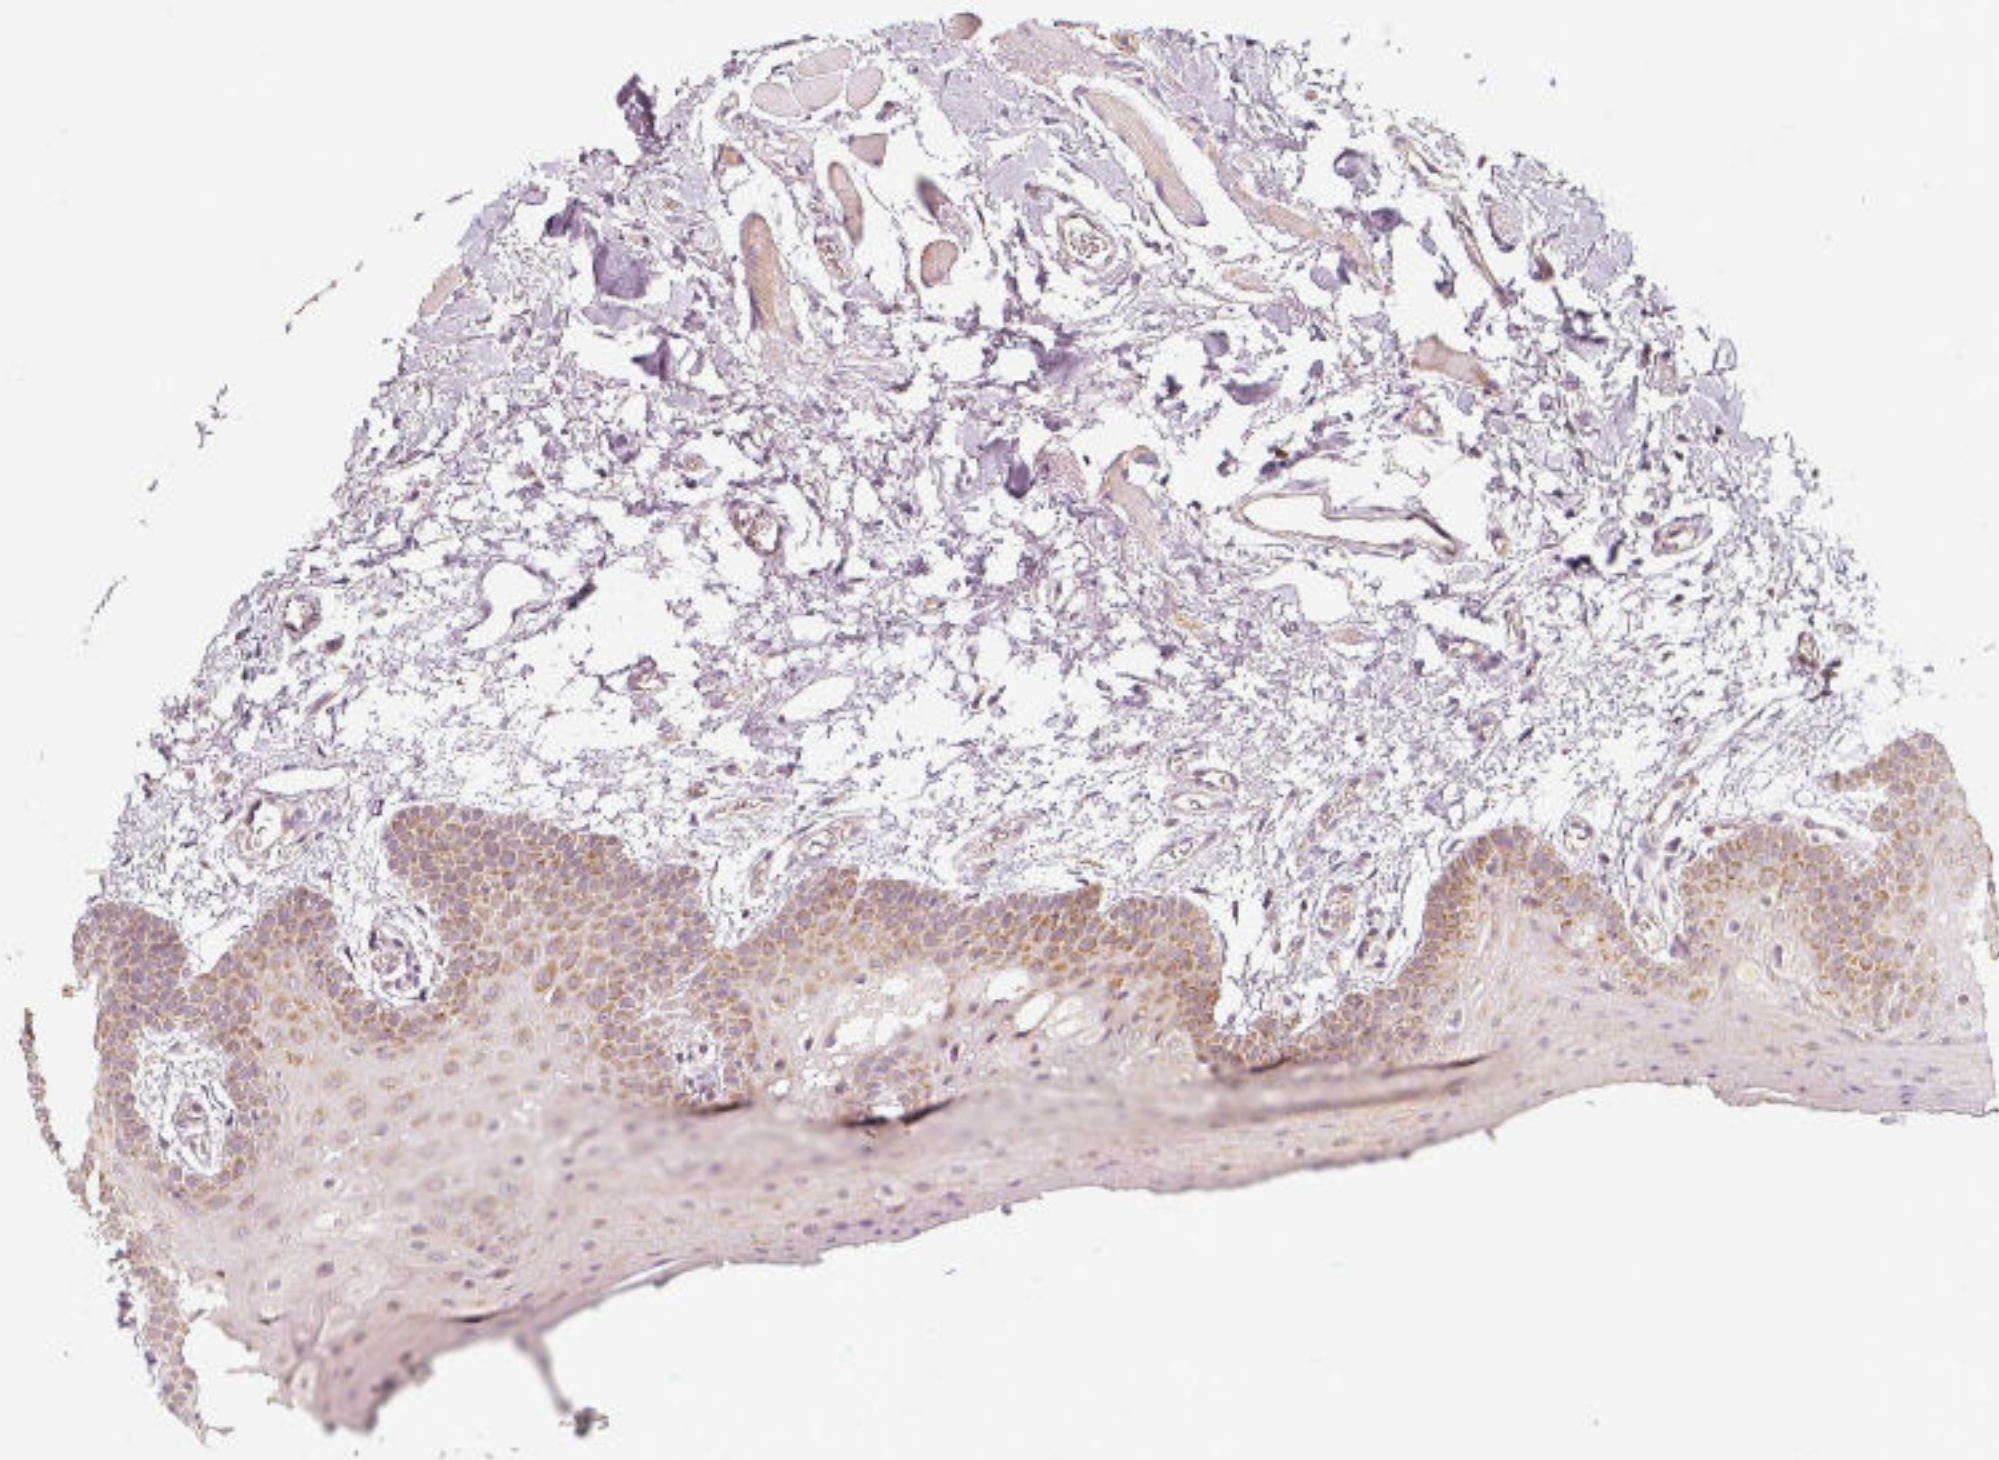

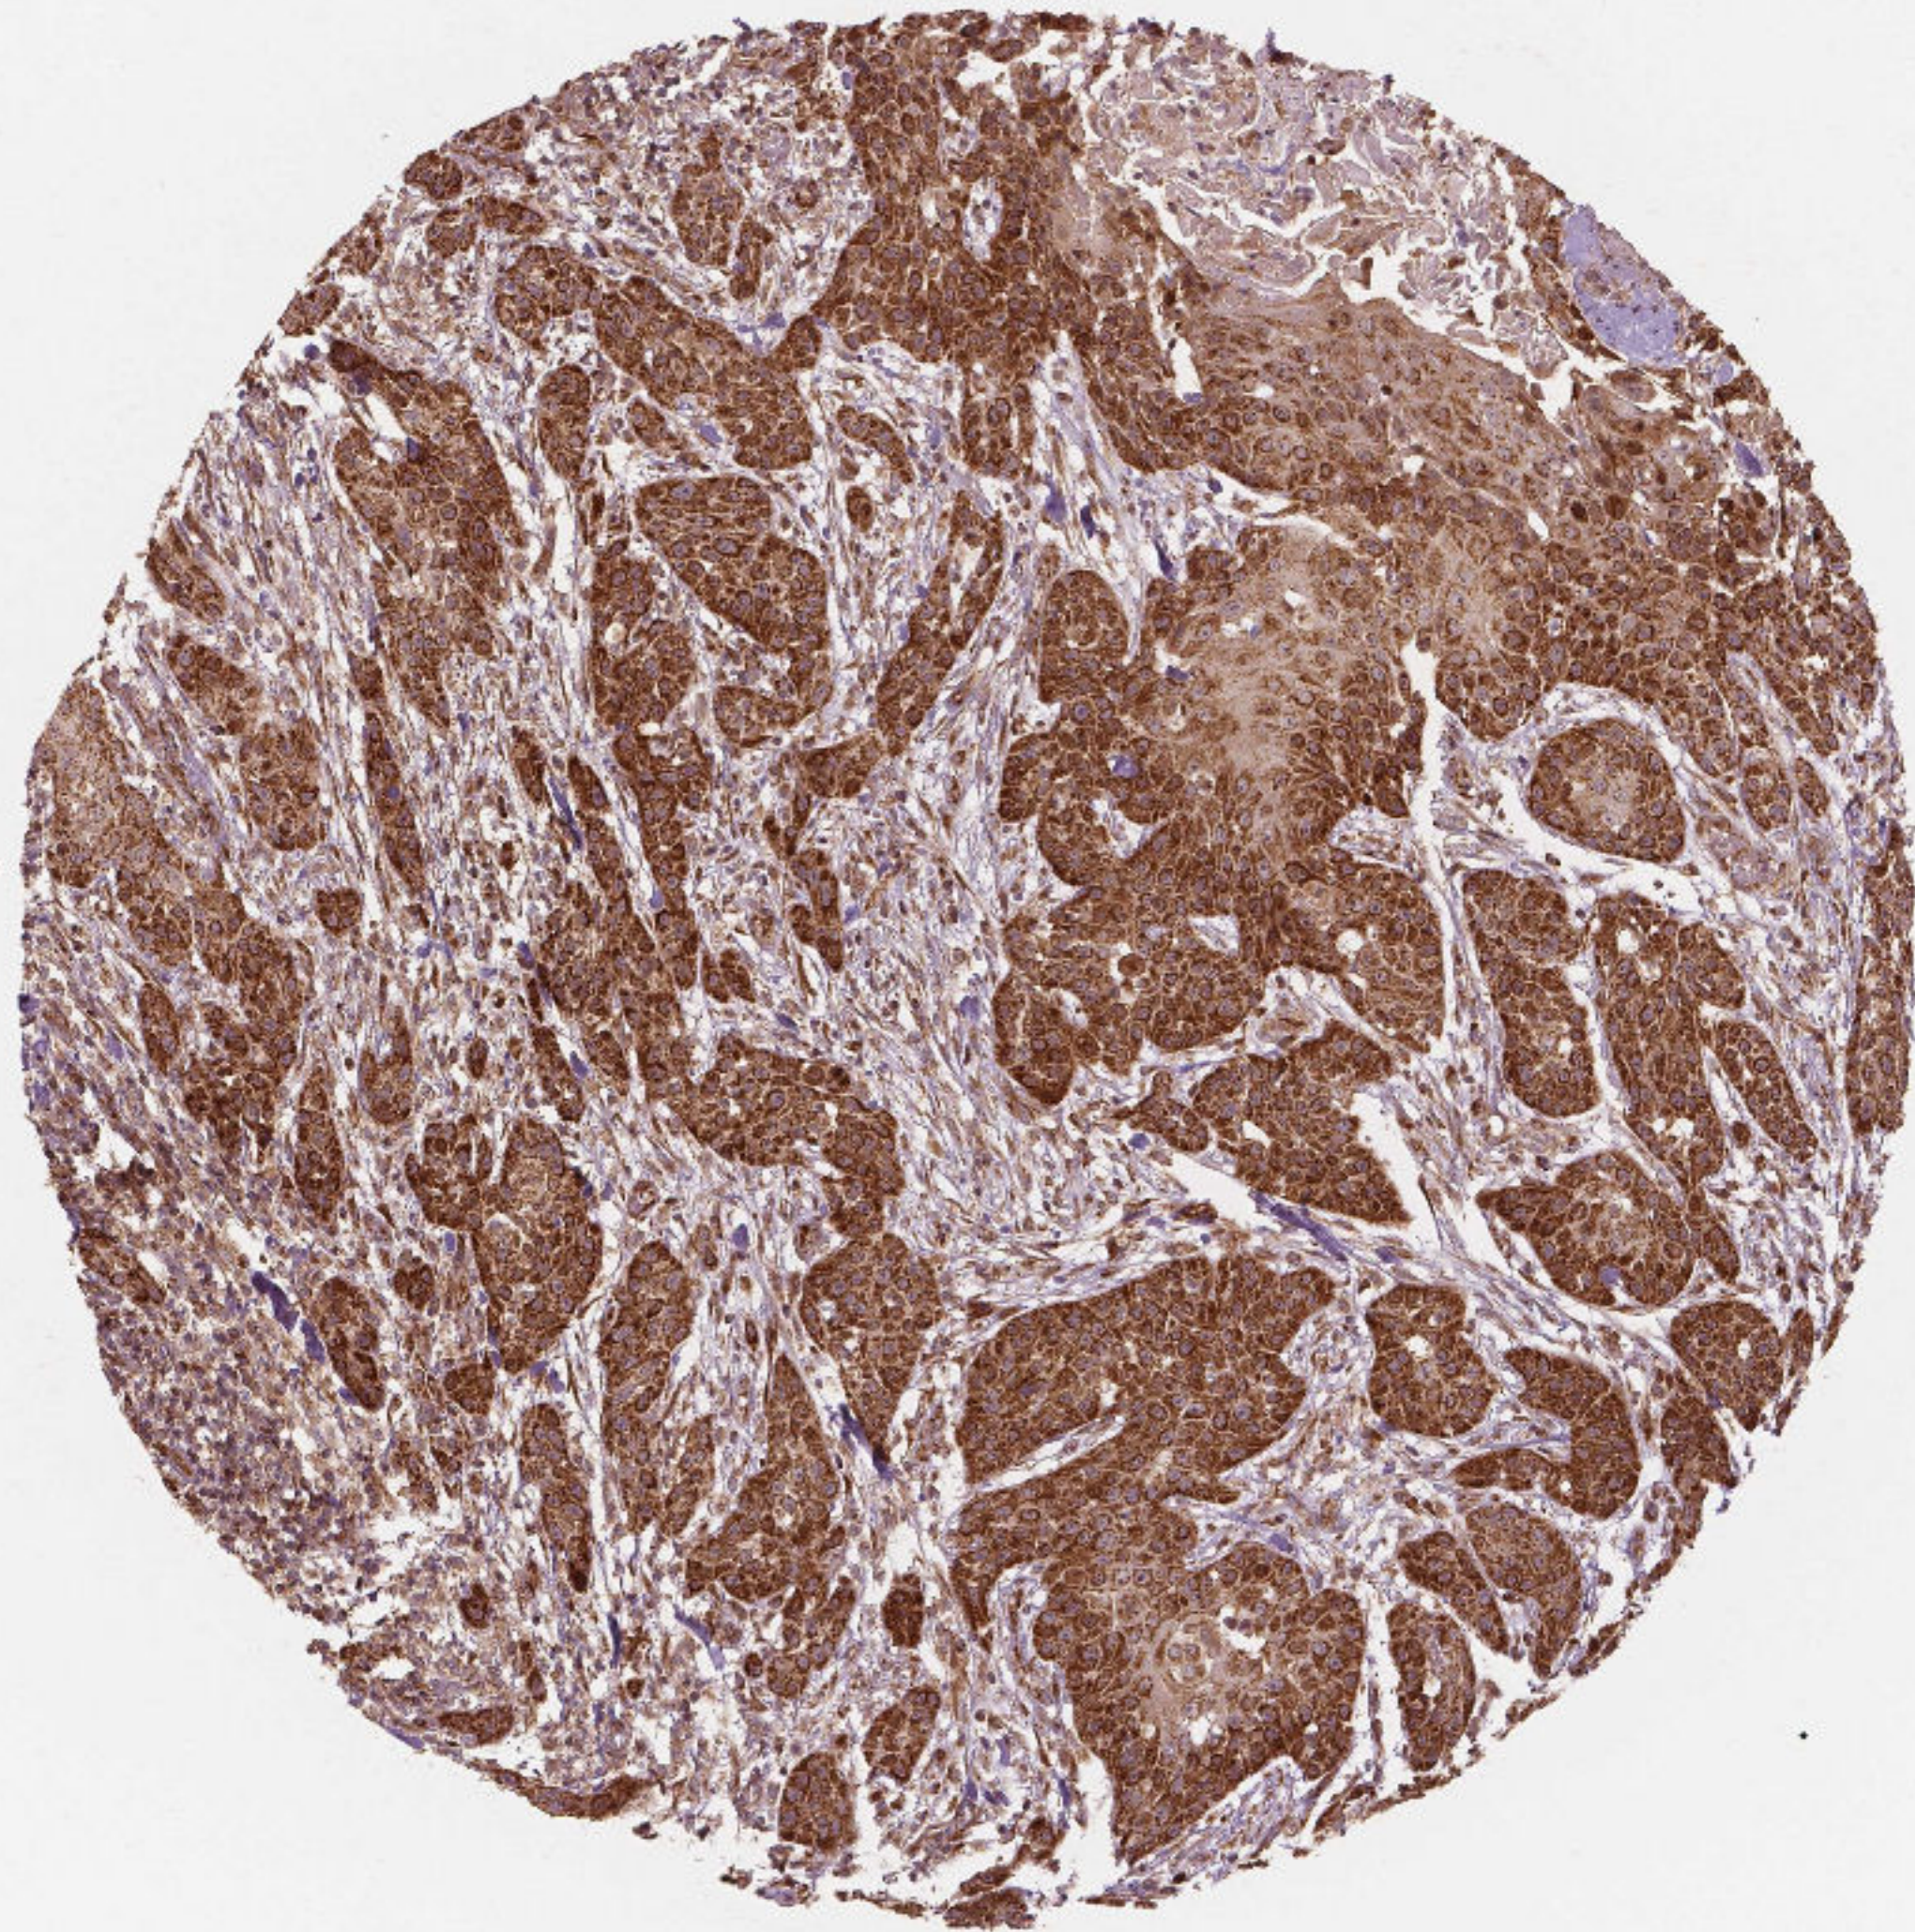

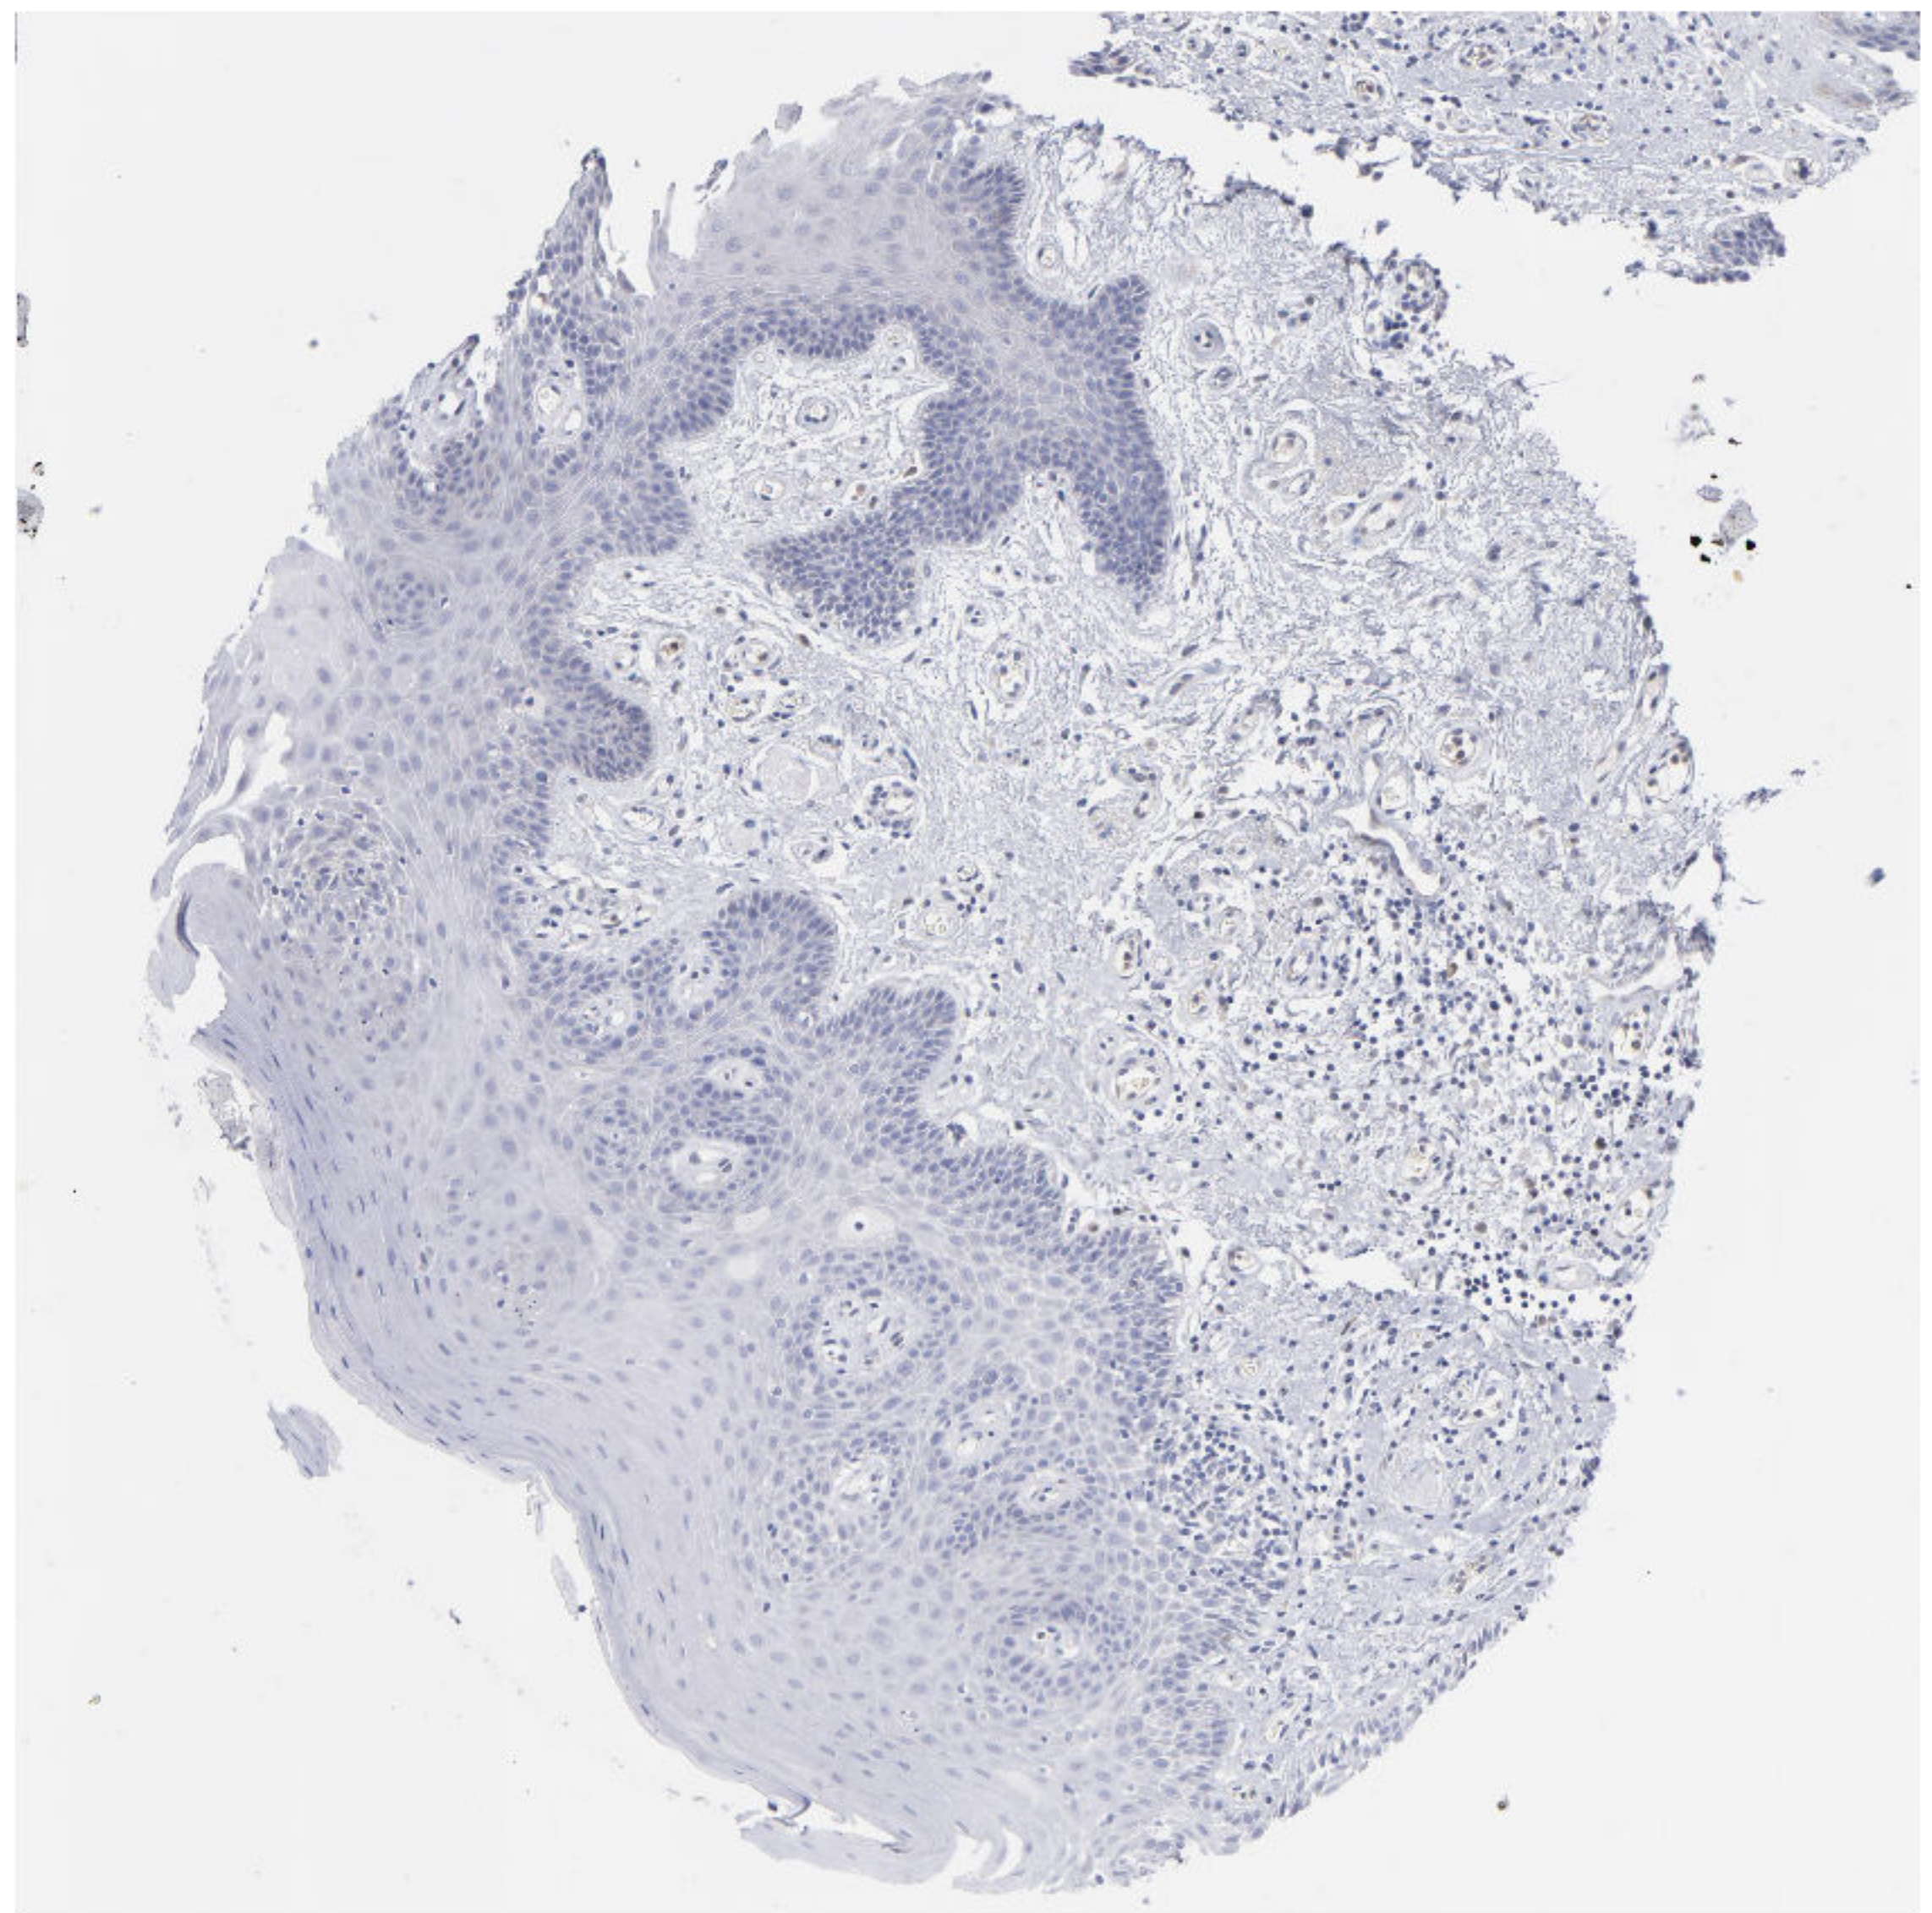

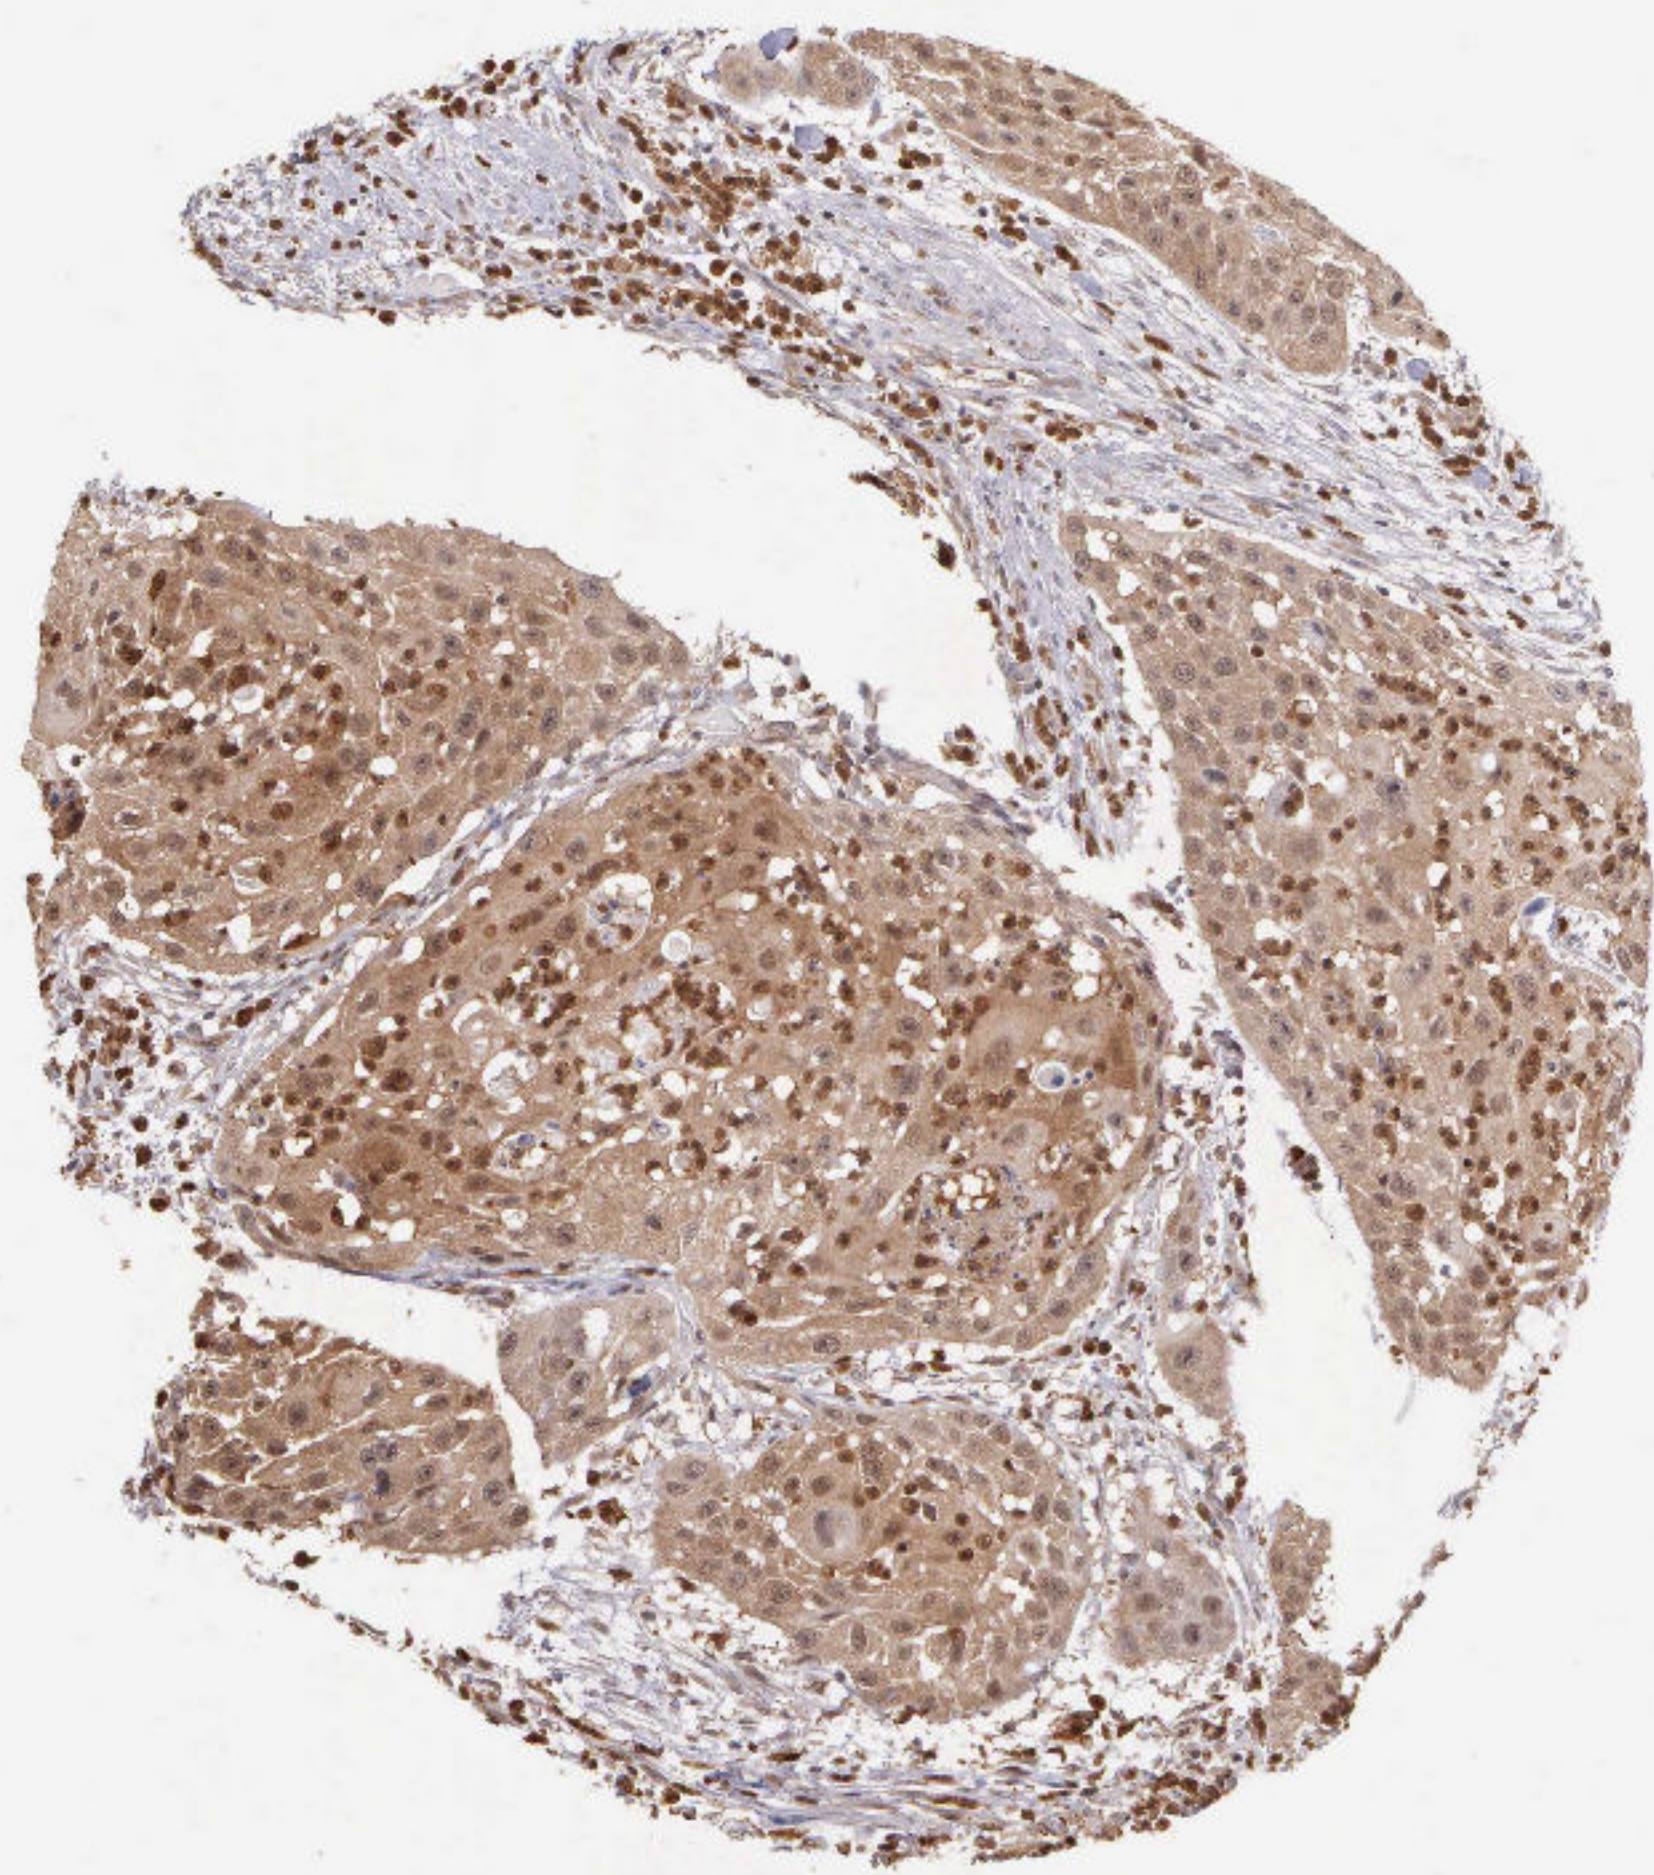

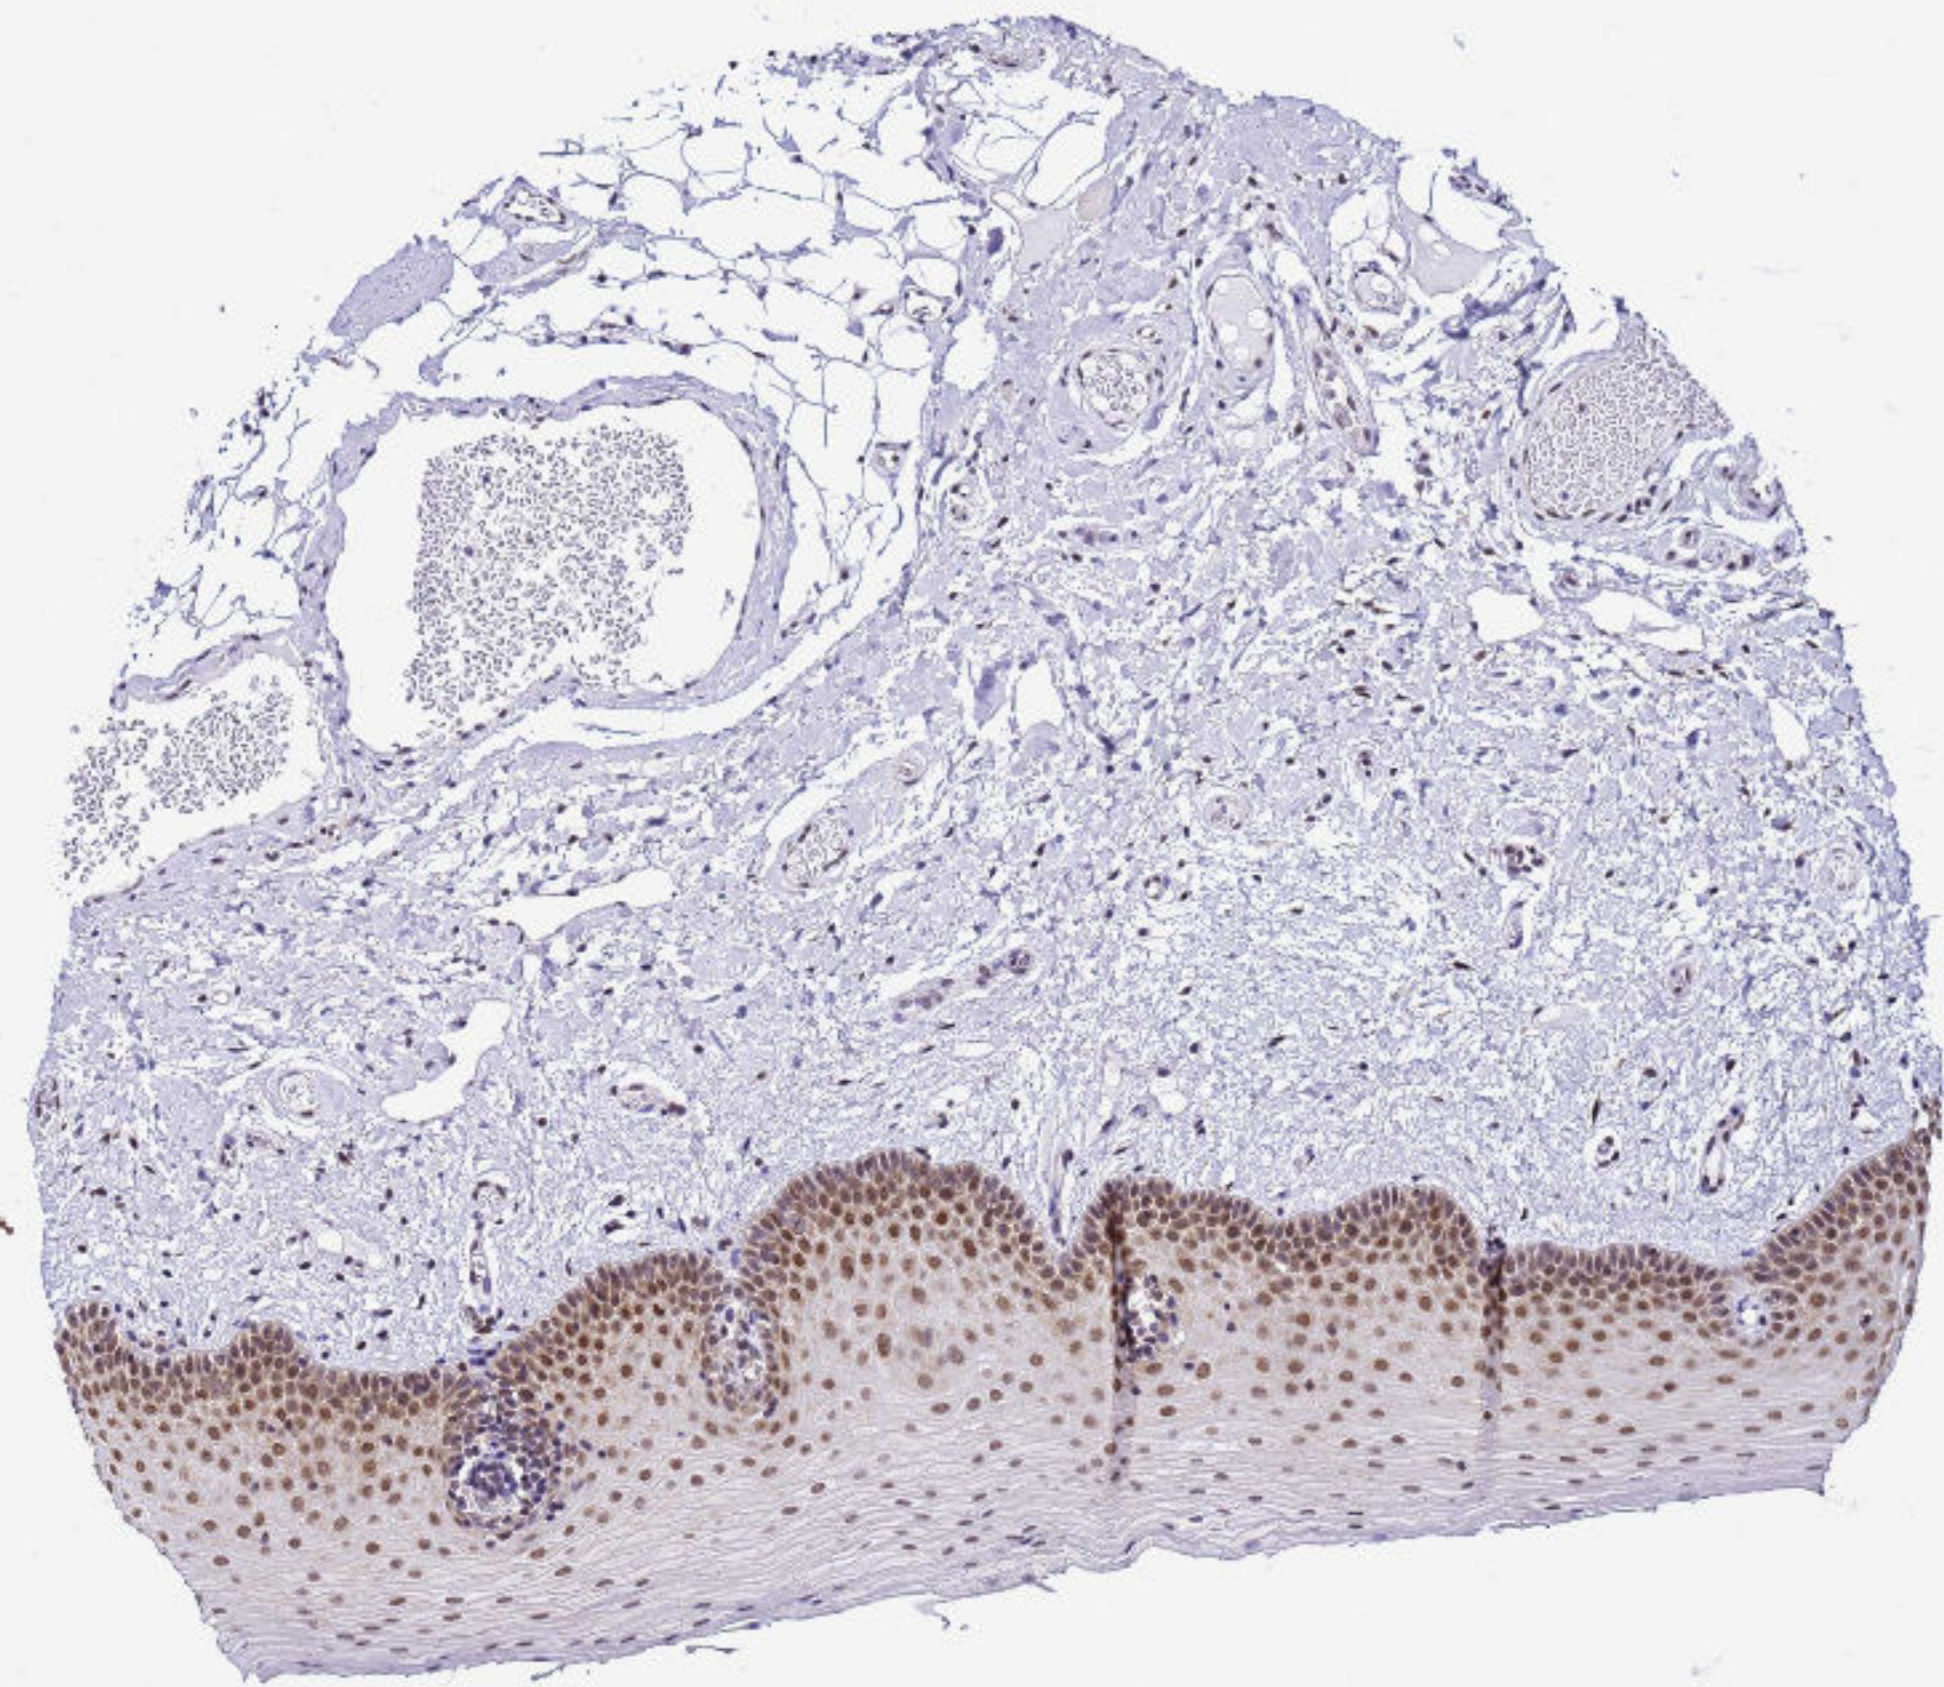

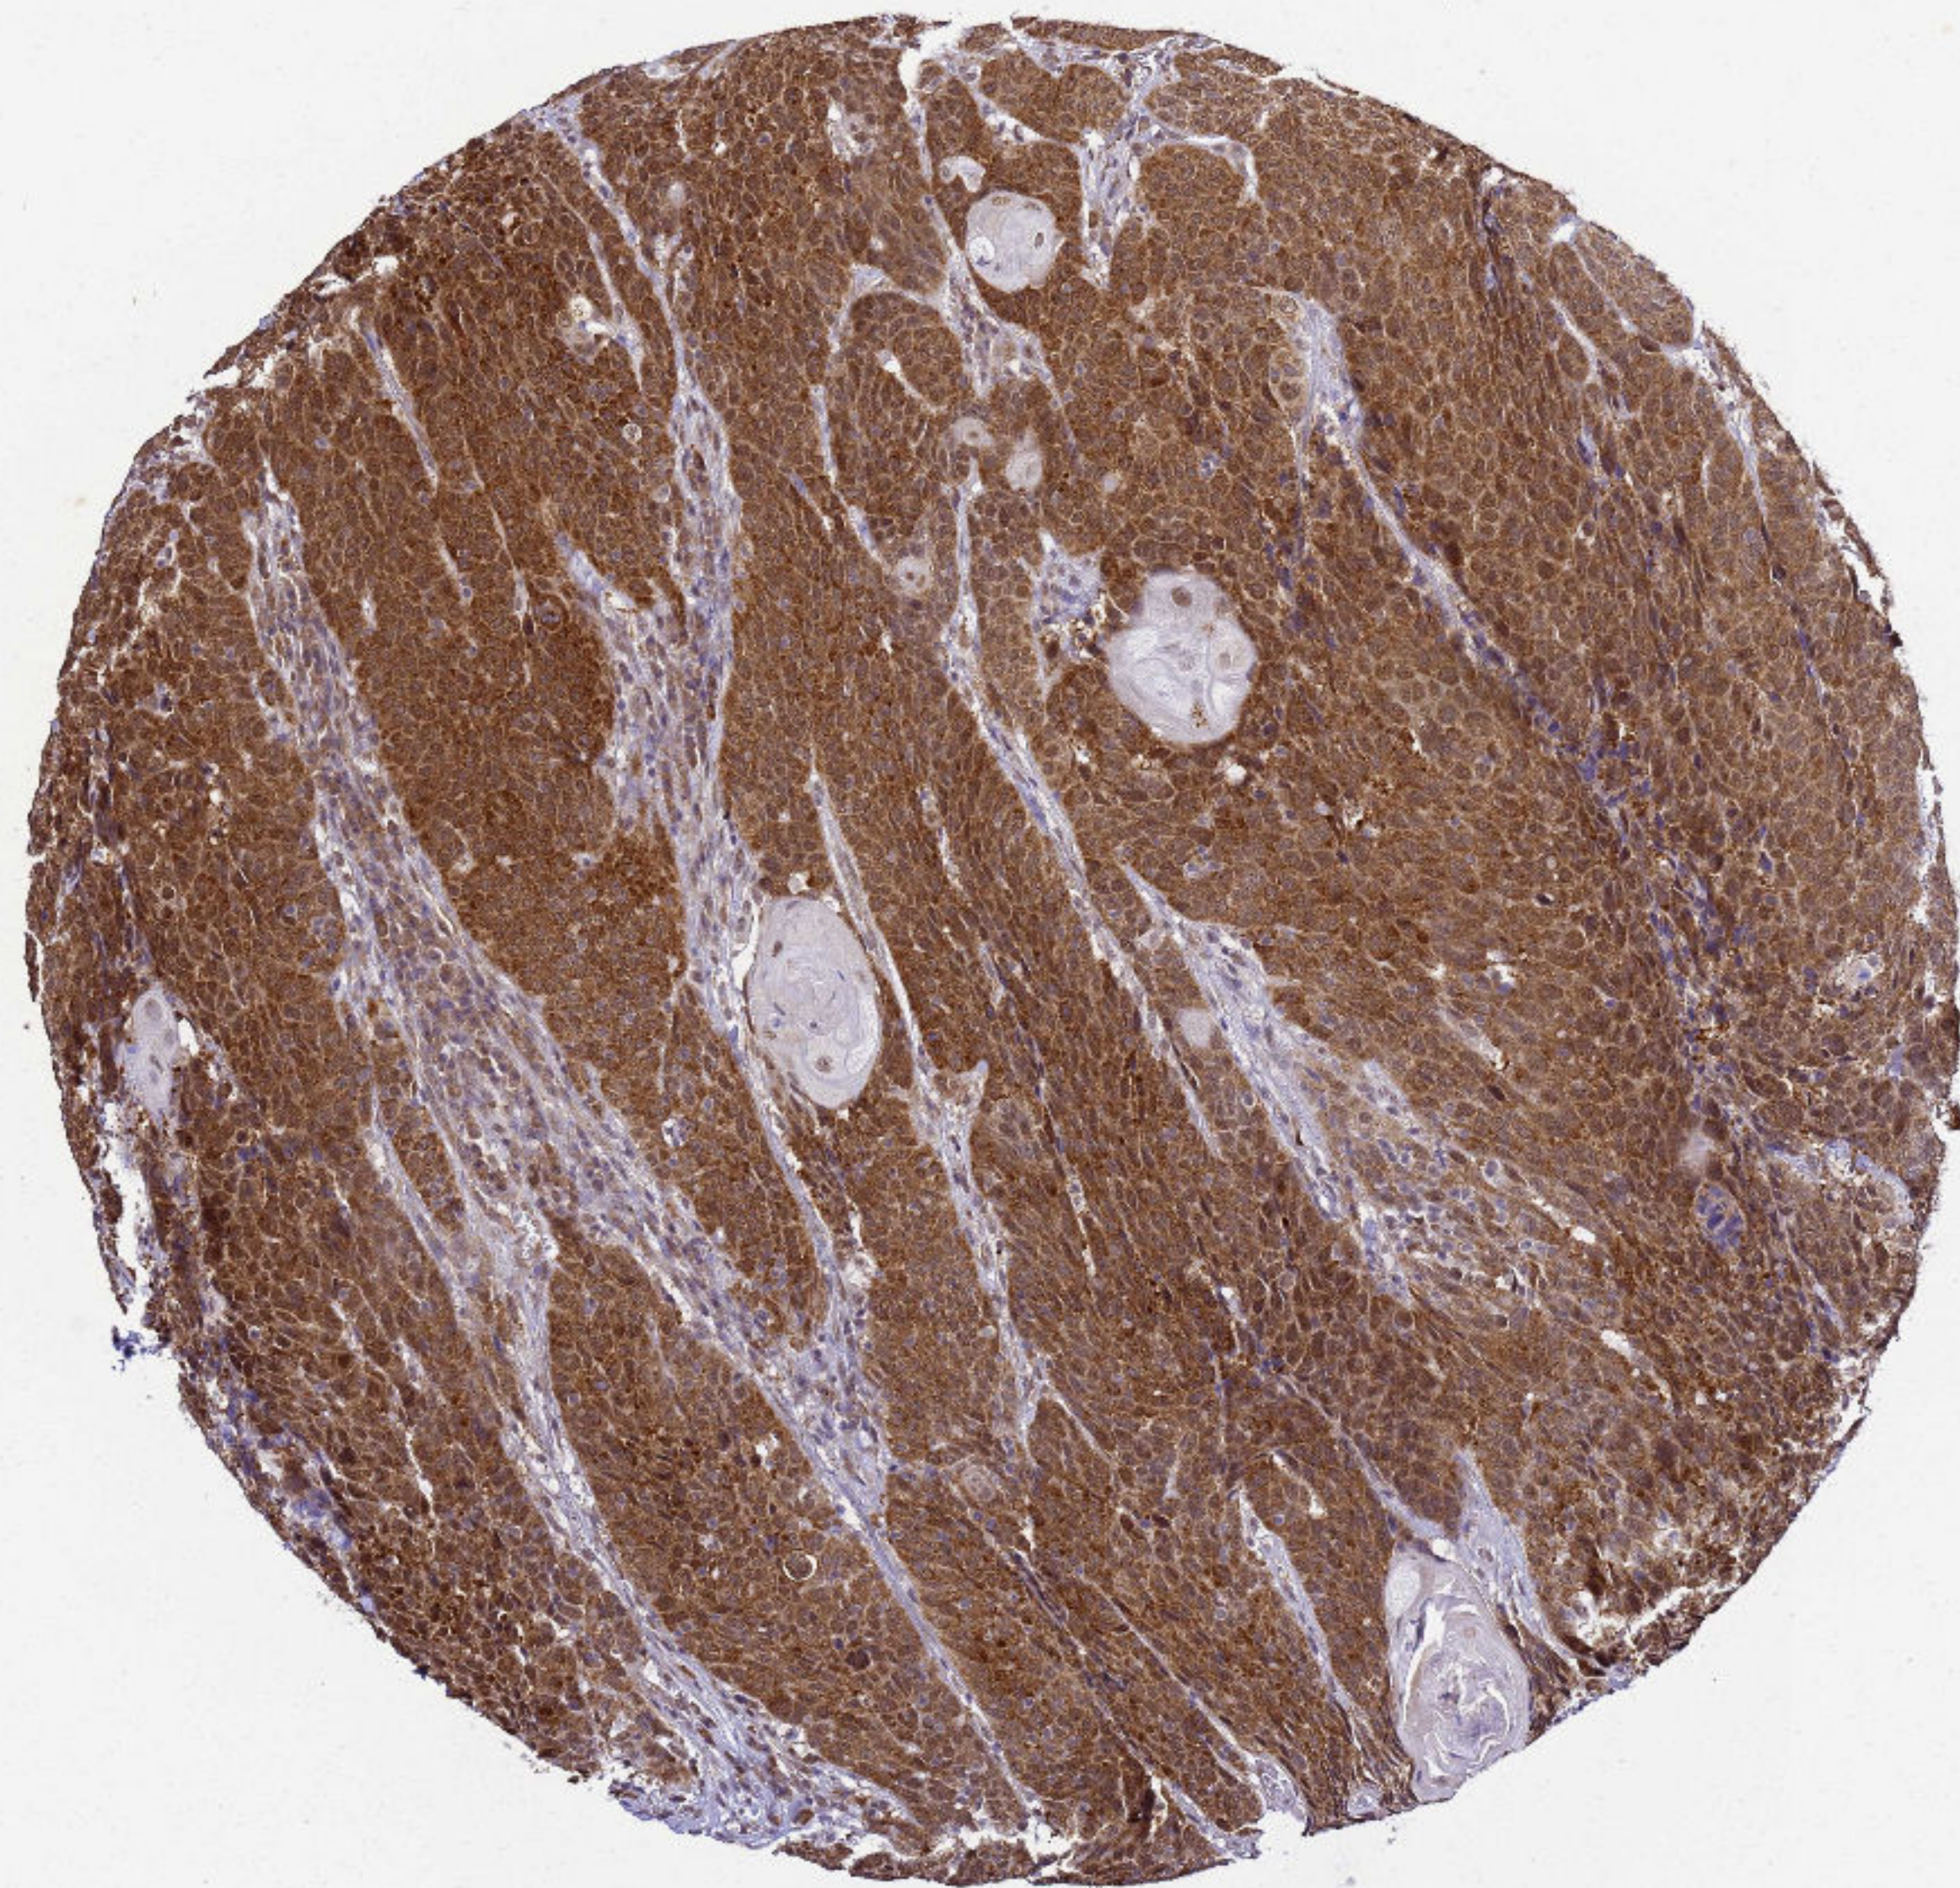

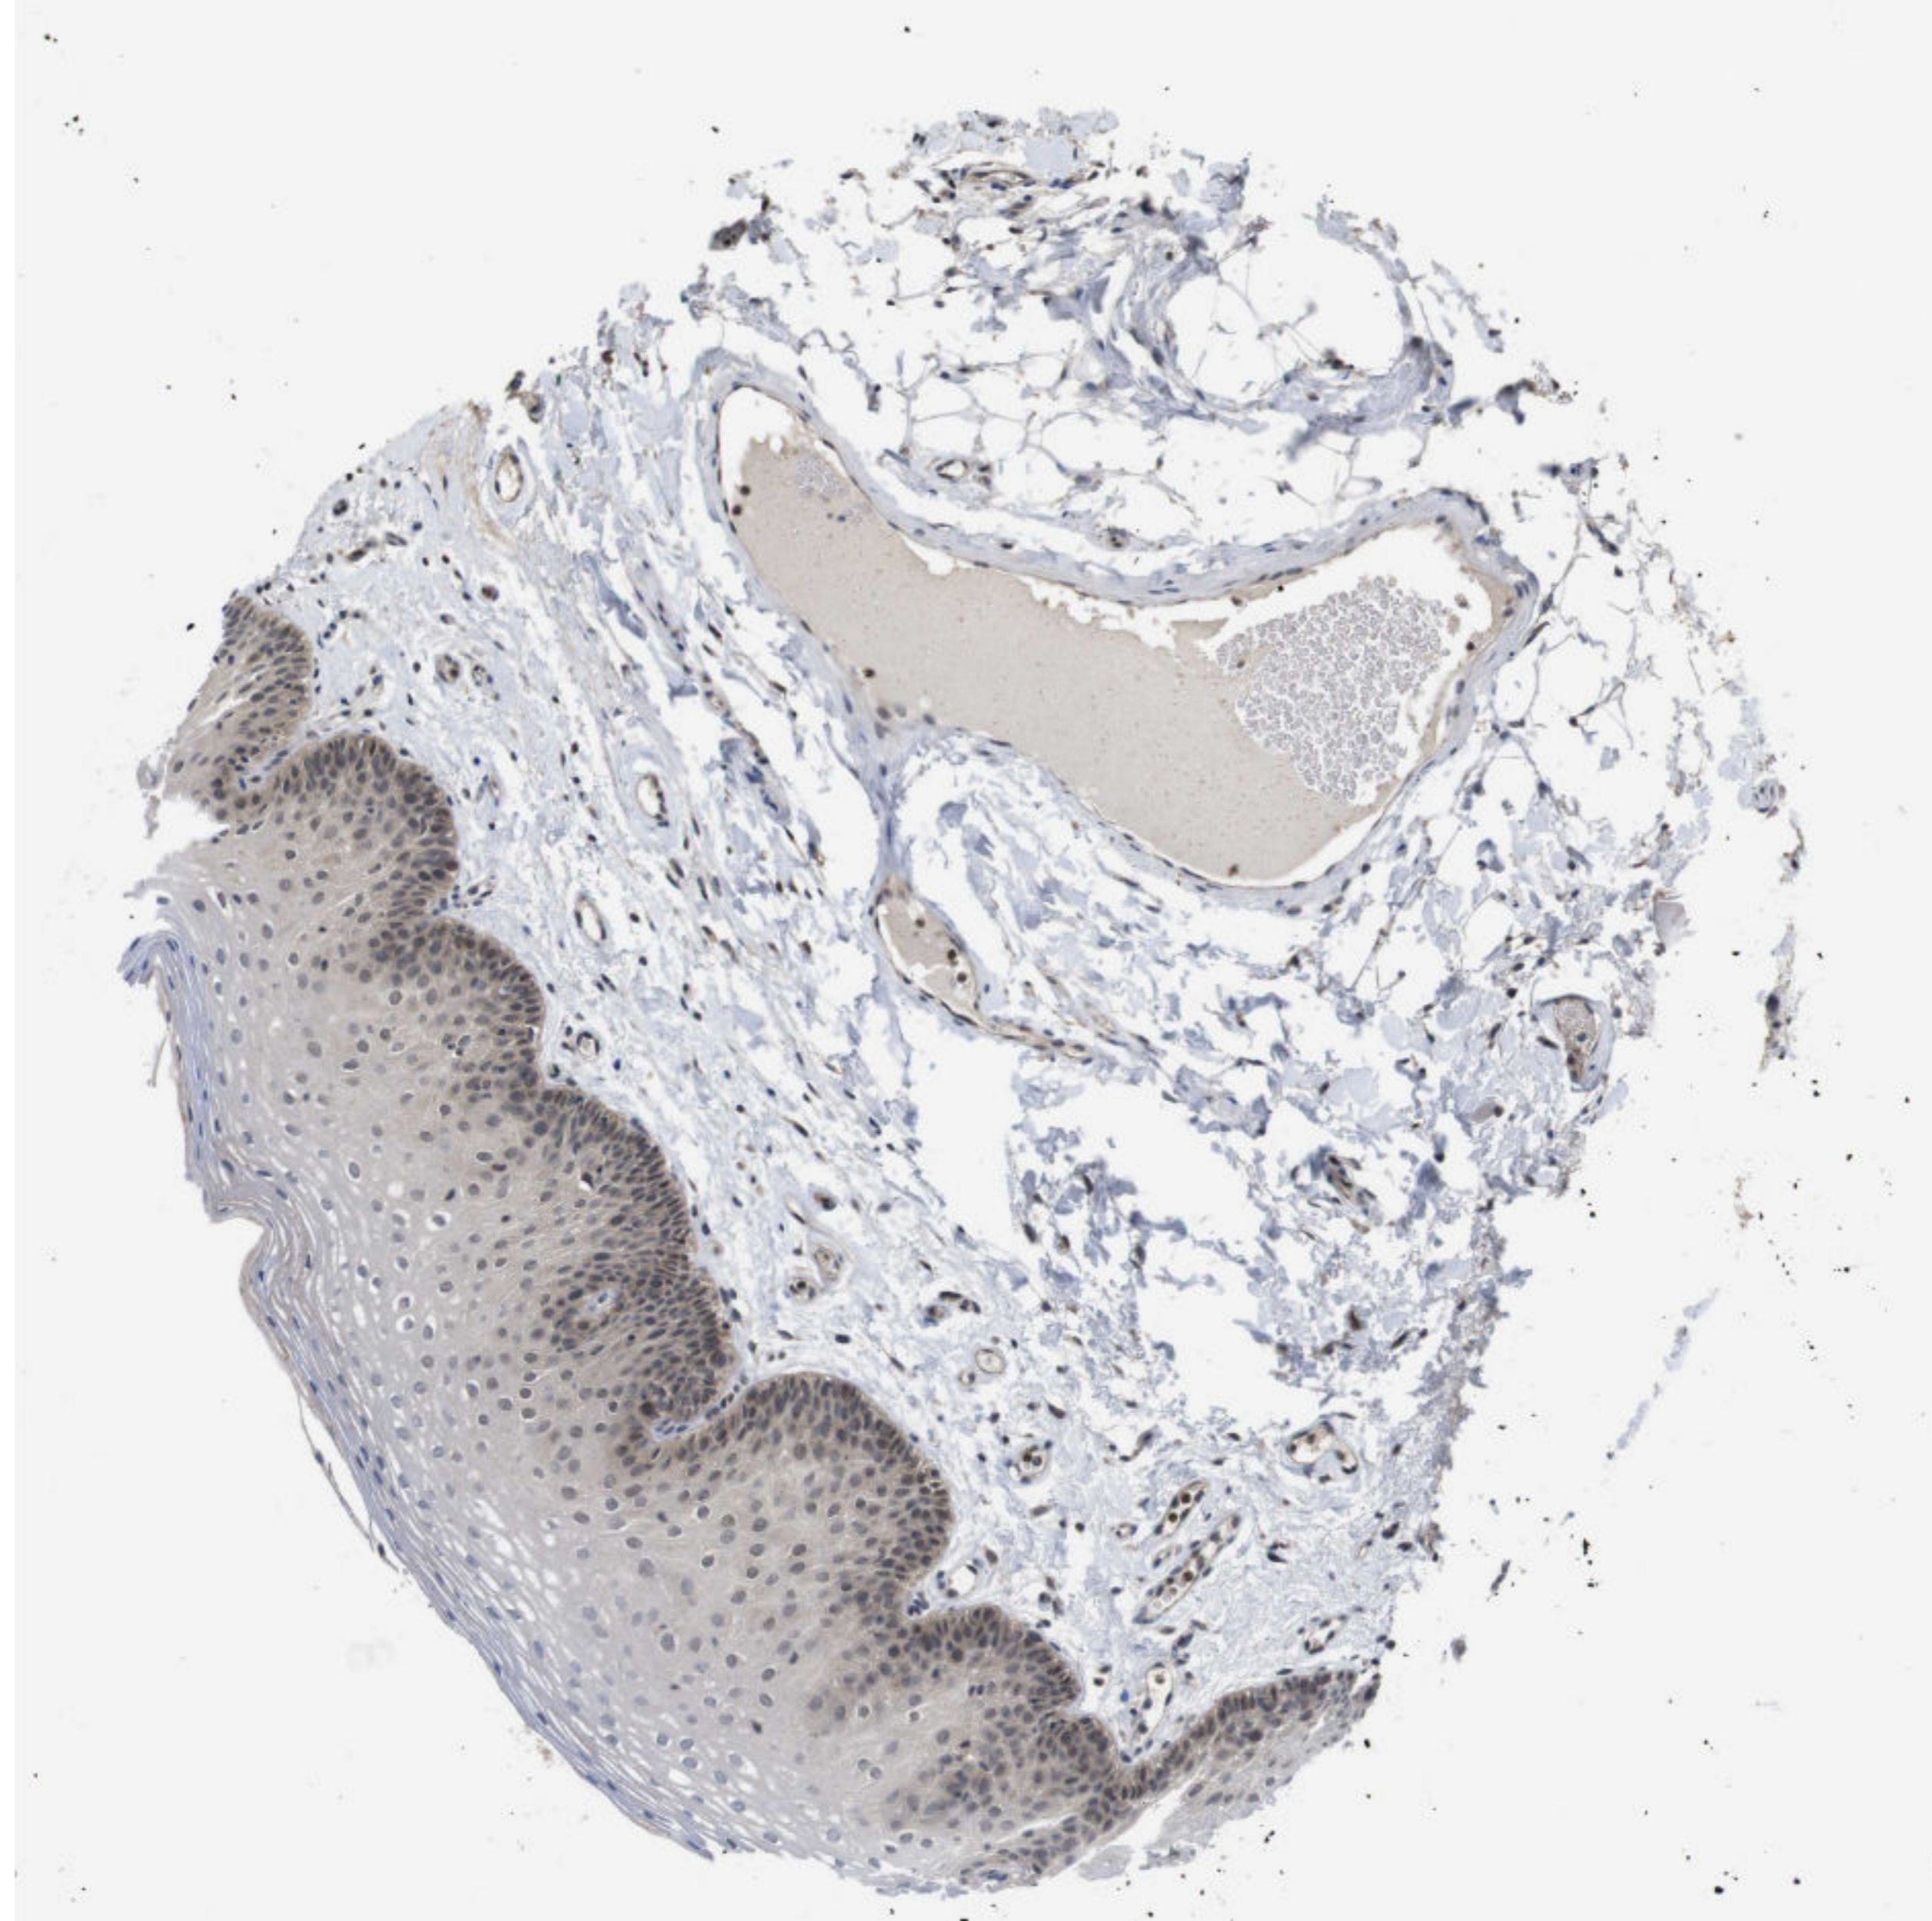

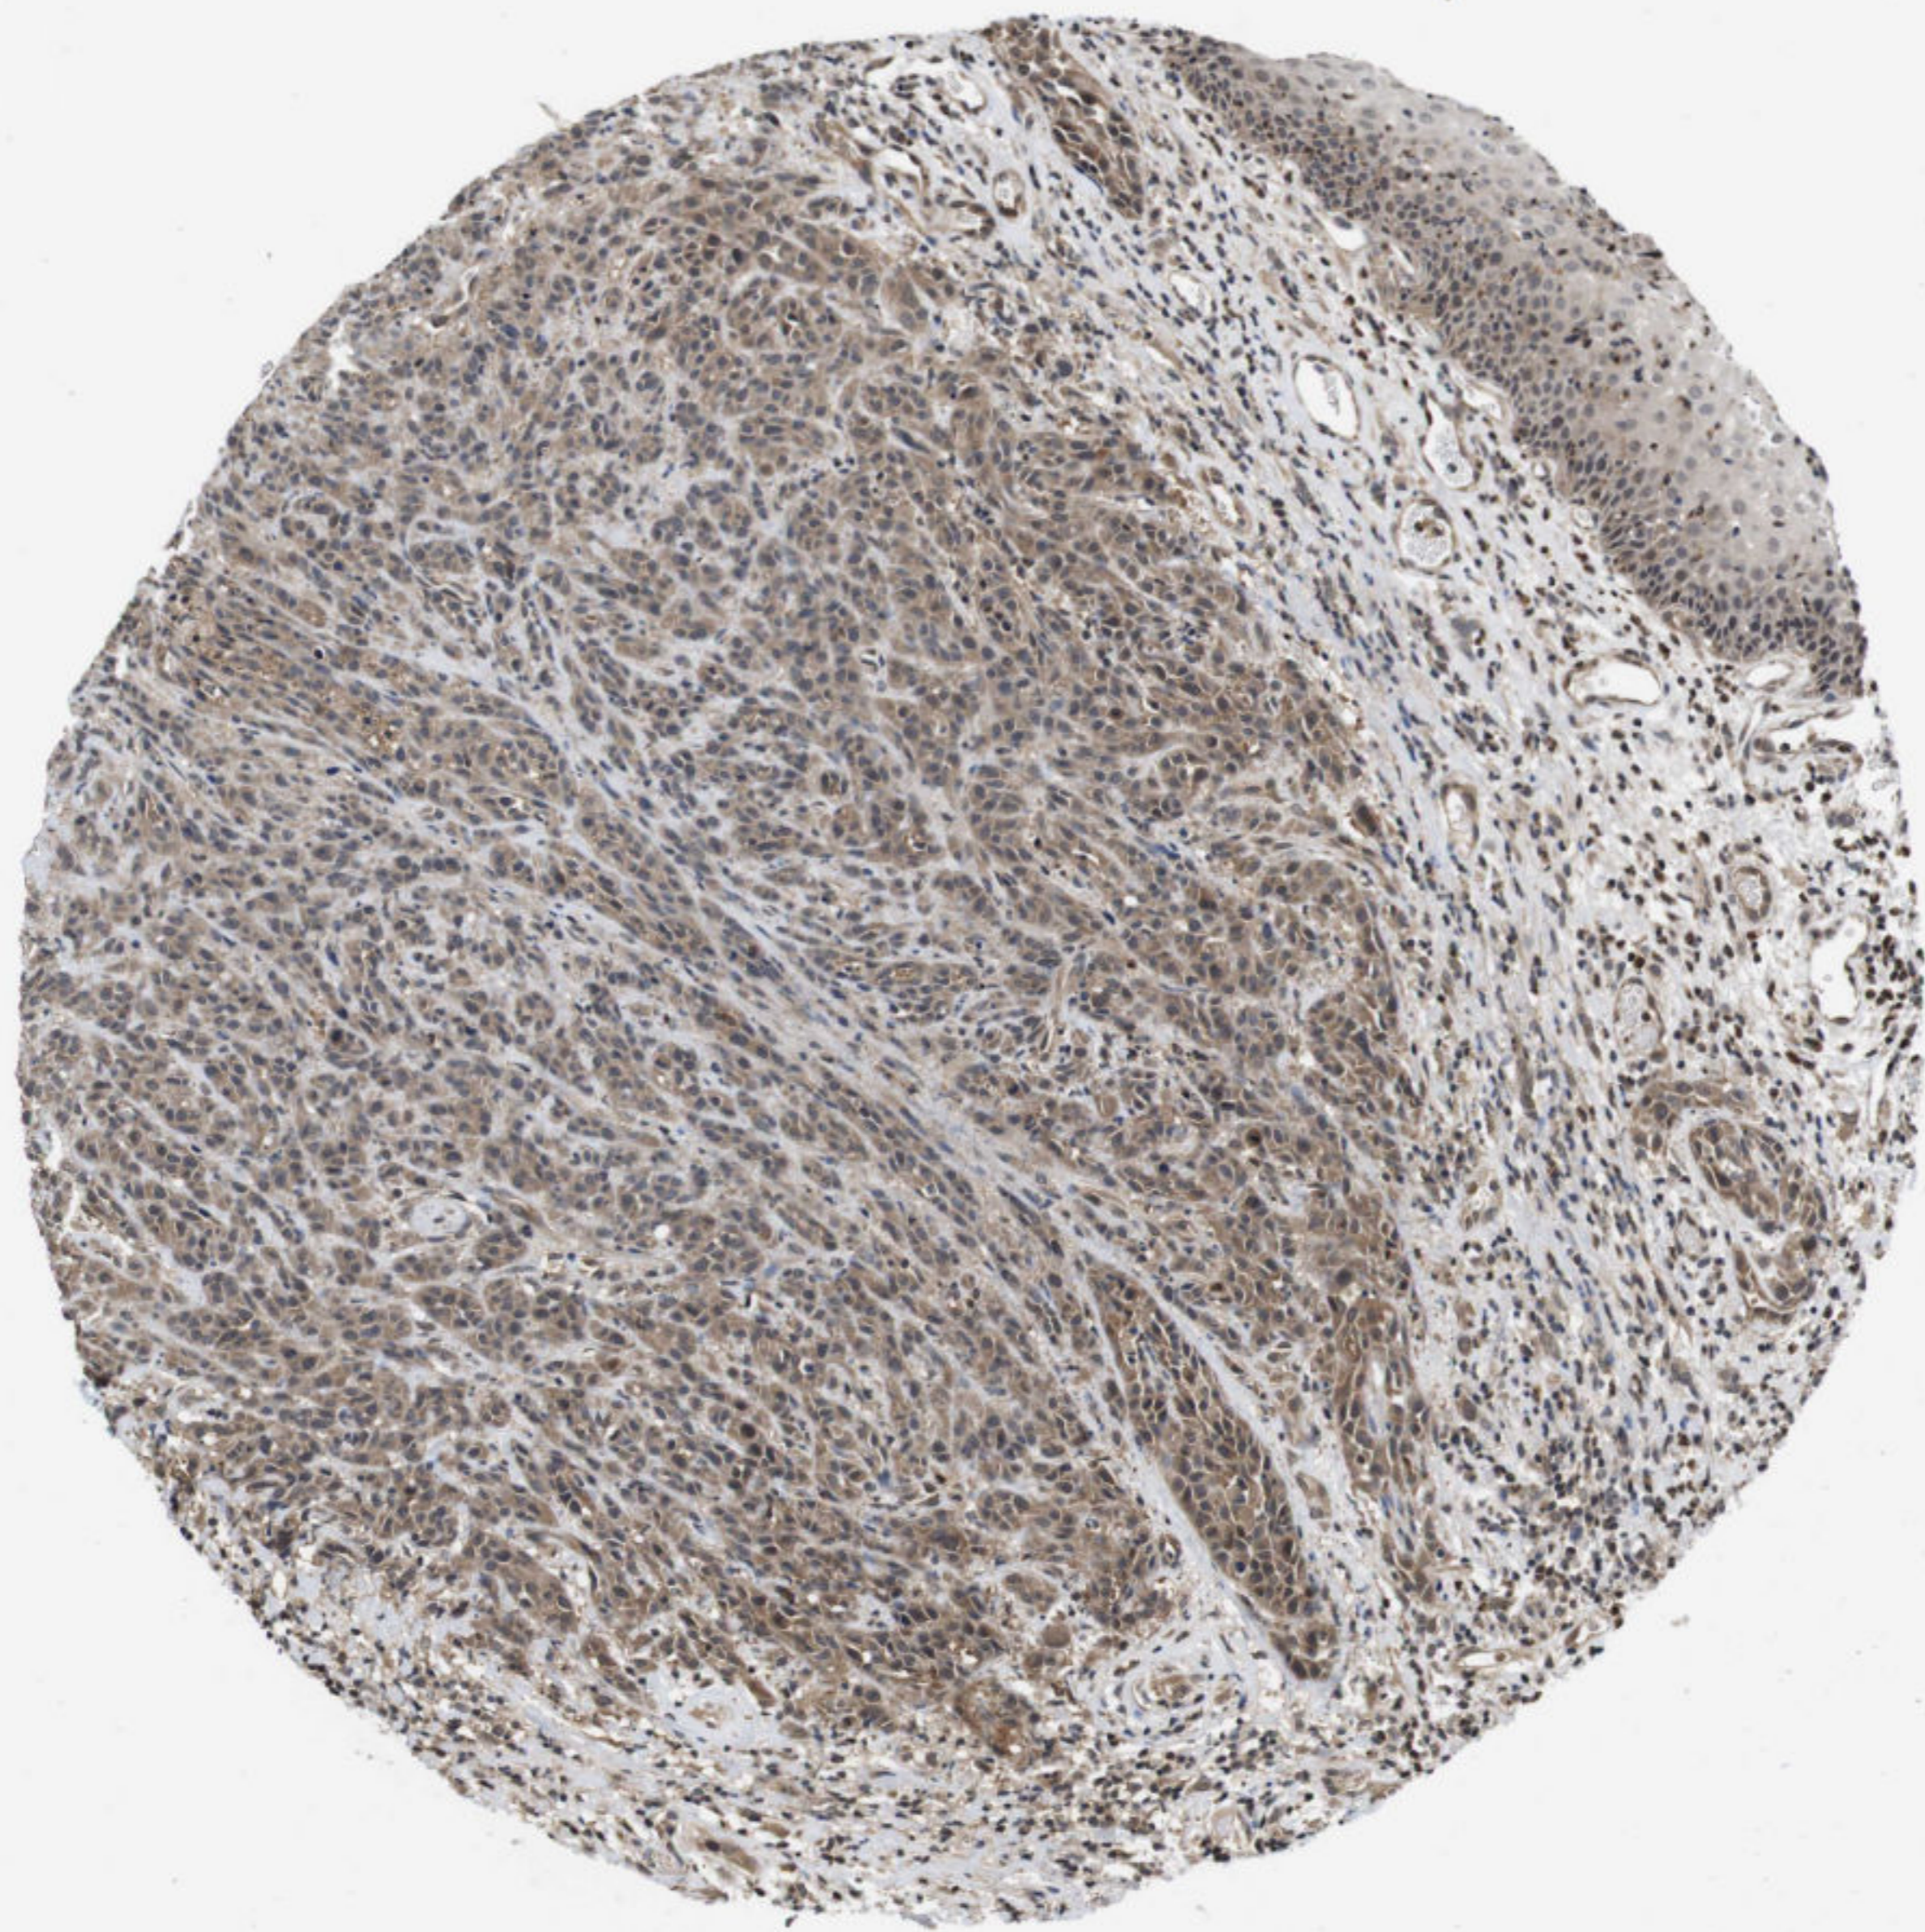

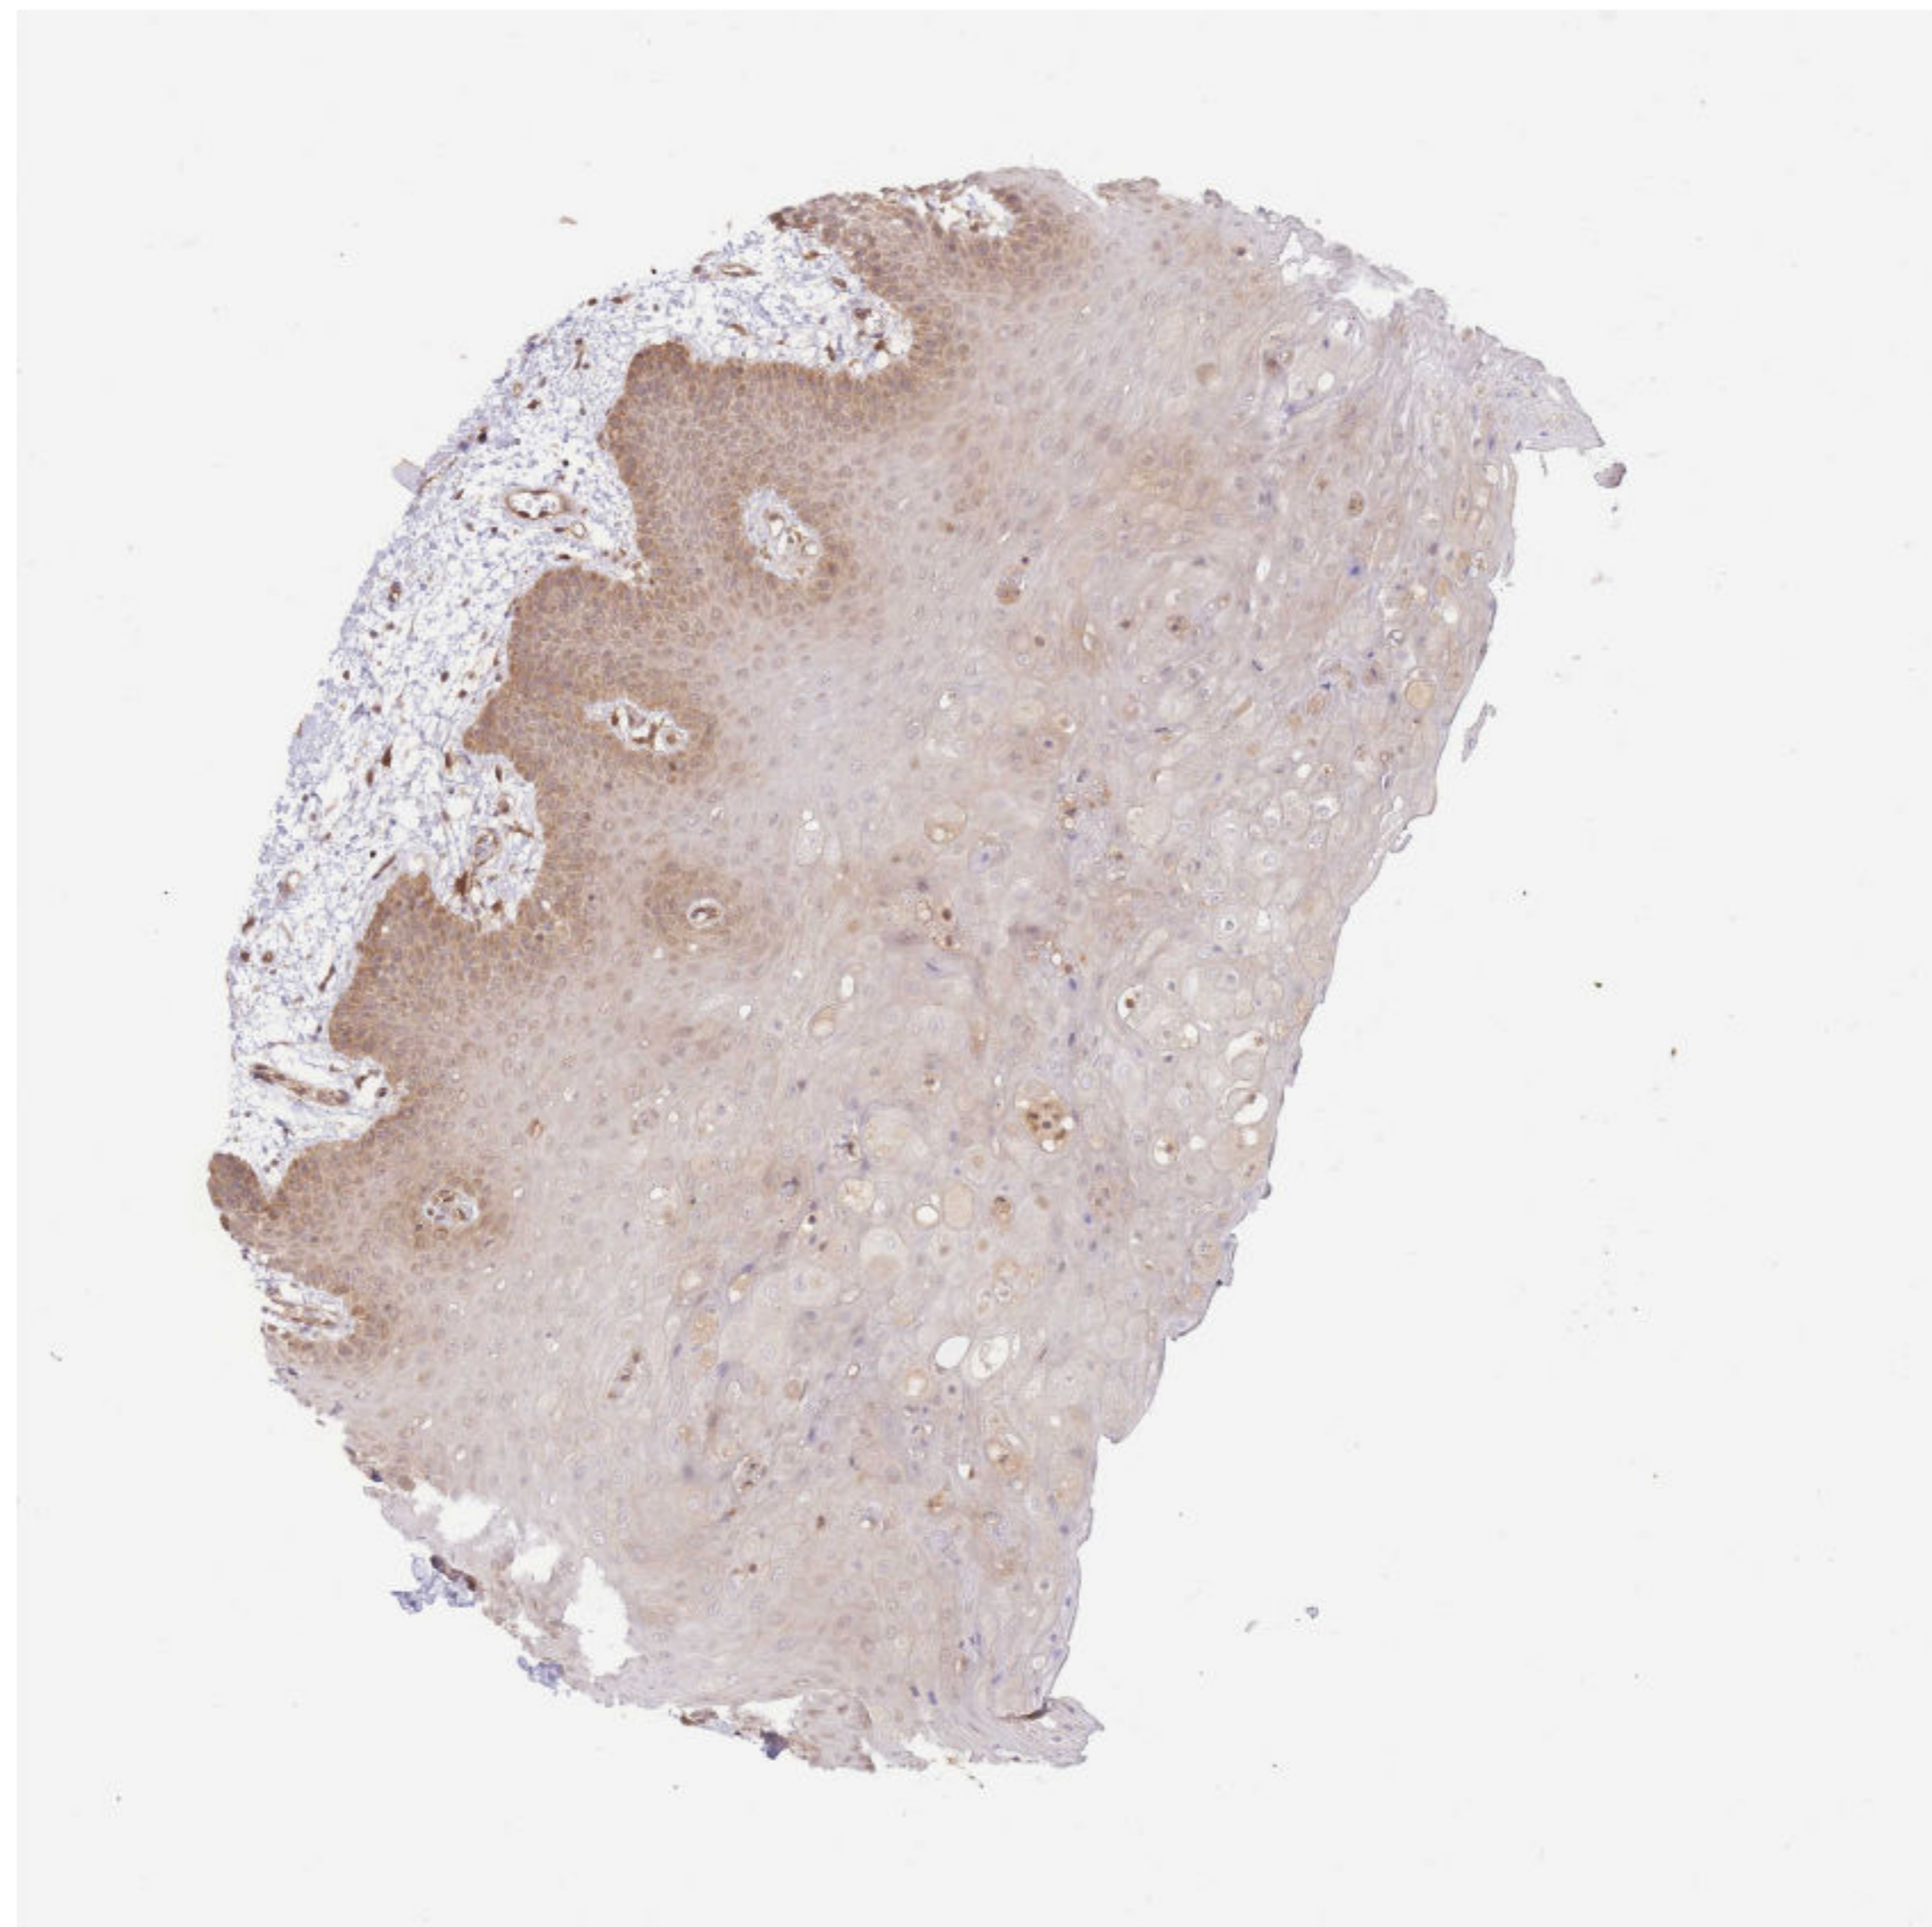

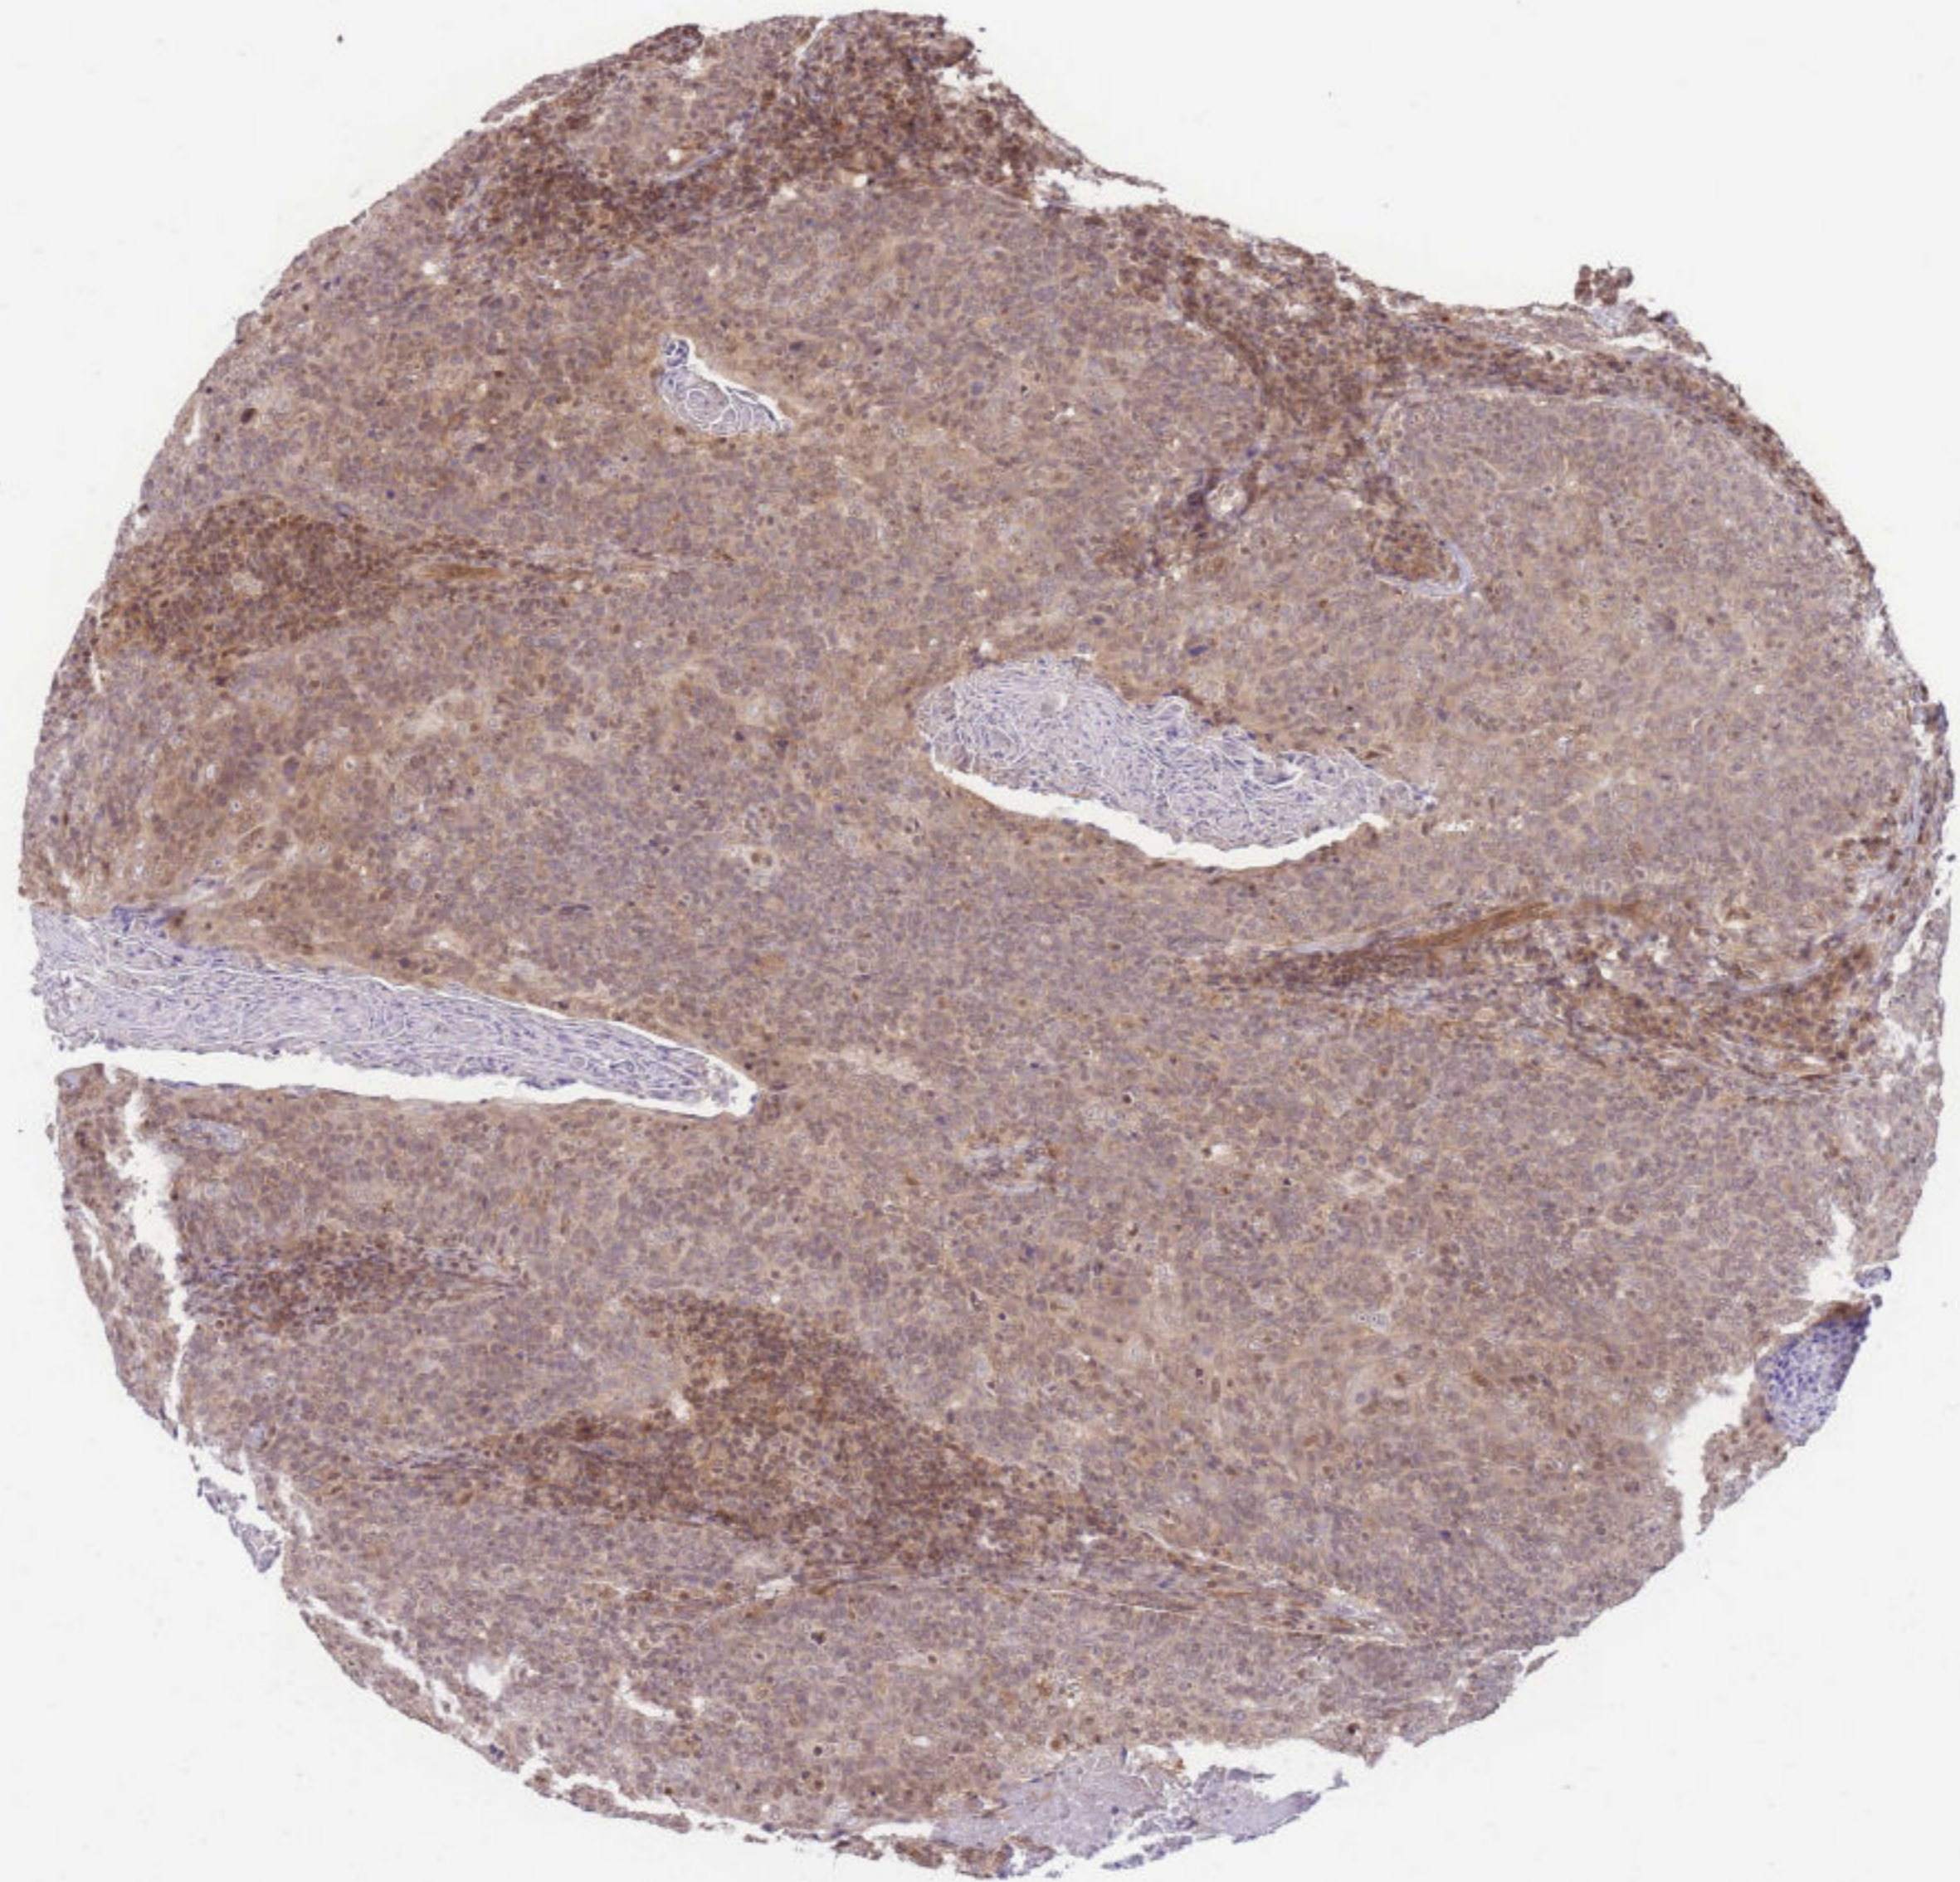

Supplement: s1 [file s1]
